# Supplementary material for: Deep-coverage whole genome sequences and blood lipids among 16,324 individuals
Source: PubMed Central journal article supplement (PMC6107638; doi:10.1038/s41467-018-05747-8), 2018-08-23
Supplement: 41467_2018_5747_MOESM1_ESM.pdf [file 41467_2018_5747_MOESM1_ESM.pdf]

1 Supplementary Information

2

3 **Deep-coverage whole genome sequences and blood lipids among 16,324 individuals**

4 Natarajan et al

5

6

7 **Supplementary Note 1**

8  
9 **Study participants**

10  
11 Framingham Heart Study (FHS)

12 The FHS is a three generational prospective cohort that has been described in detail previously.<sup>1</sup>  
13 Individuals were initially recruited in 1948 in Framingham, USA to evaluate cardiovascular  
14 disease risk factors. The second generation cohort (5,124 offspring of the original cohort) was  
15 recruited between 1971 and 1975. The third generation cohort (4,095 grandchildren of the  
16 original cohort) was collected between 2002 and 2005. Fasting lipid levels were measured at  
17 exam 1 of the Offspring (1971-1975) and third generation (2002-2005) cohorts, using standard  
18 LRC protocols.

19  
20 Jackson Heart Study (JHS)

21 The JHS is a large, population-based observational study evaluating the etiology of  
22 cardiovascular, renal, and respiratory diseases among African Americans residing in the three  
23 counties (Hinds, Madison, and Rankin) that make up the Jackson, Mississippi metropolitan area.<sup>2</sup>  
24 Data and biologic materials have been collected from 5,301 participants, including a nested  
25 family cohort of 1,498 members of 264 families. The age at enrollment for the unrelated cohort  
26 was 35-84 years; the family cohort included related individuals >21 years old. Participants  
27 provided extensive medical and social history, had an array of physical and biochemical  
28 measurements and diagnostic procedures, and provided genomic DNA during a baseline  
29 examination (2000-2004) and two follow-up examinations (2005-2008 and 2009-2012). The  
30 study population is characterized by a high prevalence of diabetes, hypertension, obesity, and  
31 related disorders. Annual follow-up interviews and cohort surveillance are ongoing.

32  
33 Old Order Amish (OOA)

34 The Old Order Amish individuals included in this study were participants of several ongoing  
35 studies of cardiovascular health carried out at the University of Maryland among relatively  
36 healthy volunteers from the Old Order Amish community of Lancaster County, PA and their  
37 family members.<sup>3,4</sup>

38  
39 Multi-Ethnic Study of Atherosclerosis (MESA)

40 The Multi-Ethnic Study of Atherosclerosis<sup>5</sup> is a National Heart, Lung and Blood Institute-  
41 sponsored, population-based investigation of subclinical cardiovascular disease and its  
42 progression. A total of 6,814 individuals, aged 45 to 84 years, were recruited from six US  
43 communities (Baltimore City and County, MD; Chicago, IL; Forsyth County, NC; Los Angeles  
44 County, CA; New York, NY; and St. Paul, MN) between July 2000 and August 2002.  
45 Participants were excluded if they had physician-diagnosed cardiovascular disease prior to  
46 enrollment, including angina, myocardial infarction, heart failure, stroke or TIA, resuscitated  
47 cardiac arrest or a cardiovascular intervention (e.g., CABG, angioplasty, valve replacement, or  
48 pacemaker/defibrillator placement). Pre-specified recruitment plans identified four racial/ethnic  
49 groups (White European-American, African-American, Hispanic-American, and Chinese-  
50 American) for enrollment, with targeted oversampling of minority groups to enhance statistical  
51 power.

53 FINRISK (National FINRISK Study)

54 FINRISK was a population-based cross-sectional survey designed to study the prevalence of  
55 cardiovascular risk factors in Finland.<sup>6</sup> Surveys are conducted every 5 years, and the 1997 survey  
56 included 8,389 Finnish men and women aged 25-74. Participants underwent a physical  
57 examination and completed a questionnaire regarding cardiovascular risk factors. Of these  
58 FINRISK97 participants, 7,026 had DNA samples available for this analysis and data available  
59 for at least one lipoprotein or lipid phenotype.

60  
61 EGCUT (Estonian Genome Center of University of Tartu)

62 The Estonian cohort is from the population-based biobank of the Estonian Genome Project of  
63 University of Tartu (EGCUT).<sup>7</sup> The project is conducted according to the Estonian Gene  
64 Research Act, and all participants have signed the broad informed consent. The current cohort  
65 size is > 51,515, 18 years of age and older, which reflects closely the age distribution in the adult  
66 Estonian population. Subjects are recruited by the general practitioners (GP) and physicians in  
67 the hospitals were randomly selected from individuals visiting GP offices or hospitals. Each  
68 participant filled out a computer-assisted personal interview during 1-2 hours at a doctor's office,  
69 including personal data (place of birth, place(s) of living, nationality. etc.), genealogical data  
70 (three generation family history), educational and occupational history, and lifestyle data  
71 (physical activity, dietary habits, smoking, alcohol consumption, women's health, quality of life).

72  
73  
74 **Supplementary Note 2**

75  
76 **Additional acknowledgements**

77  
78 The Framingham Heart Study has been supported by contracts N01-HC-25195 and  
79 HHSN268201500001I and grant R01 HL092577. The Framingham Heart Study thanks the study  
80 participants and the multitude of investigators who over its 70-year history continue to contribute  
81 so much to further our knowledge of heart, lung, blood and sleep disorders and associated traits.  
82 The Jackson Heart Study (JHS) is supported and conducted in collaboration with Jackson State  
83 University (HHSN268201300049C and HHSN268201300050C), Tougaloo College  
84 (HHSN268201300048C), and the University of Mississippi Medical Center  
85 (HHSN268201300046C and HHSN268201300047C) contracts from the National Heart, Lung,  
86 and Blood Institute (NHLBI) and the National Institute for Minority Health and Health  
87 Disparities (NIMHD). The authors also wish to thank the staffs and participants of the JHS.  
88 J.G.W. is supported by U54GM115428 from the National Institute of General Medical Sciences.

89

90 MESA and the MESA SHARe project are conducted and supported by the National Heart, Lung,  
91 and Blood Institute (NHLBI) in collaboration with MESA investigators. Support for MESA is  
92 provided by contracts HHSN268201500003I, N01-HC-95159, N01-HC-95160, N01-HC-95161,  
93 N01-HC-95162, N01-HC-95163, N01-HC-95164, N01-HC-95165, N01-HC-95166, N01-HC-  
94 95167, N01-HC-95168, N01-HC-95169, UL1-TR-000040, UL1-TR-001079, UL1-TR-001420.

95 The provision of genotyping data was supported in part by the National Center for Advancing  
96 Translational Sciences, CTSI grant UL1TR001881, and the National Institute of Diabetes and  
97 Digestive and Kidney Disease Diabetes Research Center (DRC) grant DK063491 to the Southern  
98 California Diabetes Endocrinology Research Center.

99

100 **Supplementary Table 1. Samples filtered by quality control metrics**

|                                              | OOA       | FHS       | JHS       | MESA      | FIN       | EST       |
|----------------------------------------------|-----------|-----------|-----------|-----------|-----------|-----------|
| Contamination*                               | 6         | 20        | 1         | 66        | 8         | 12        |
| Chimeras > 5%                                | 0         | 0         | 0         | 0         | 4         | 0         |
| GC dropout > 4                               | 0         | 0         | 0         | 0         | 1         | 0         |
| Raw coverage†                                | 0         | 7         | 0         | 23        | 0         | 4         |
| Indeterminate genotypic sex‡                 | 0         | 0         | 0         | 1         | 2         | 0         |
| Duplicates / monozygotic twins§              | 4         | 15        | 2         | 1         | 0         | 0         |
| Expected population outliers by PCA          | 0         | 5         | 14        | 0         | 0         | 0         |
| Variant metric count outliers                | 0         | 6         | 2         | 0         | 0         | 0         |
| Array-sequencing genotype concordance < 0.95 | 0         | 1         | 0         | 0         | 0         | 10        |
| Mendelian violations                         | 2         | 0         | 0         | 0         | 0         | 0         |
| <b>TOTAL FILTERED</b>                        | <b>12</b> | <b>50</b> | <b>19</b> | <b>91</b> | <b>15</b> | <b>26</b> |

101 \* Contamination threshold for all samples was > 3.0% but was >5.0% for the combined Finland and Estonia callset.

102 † Raw coverage threshold for all samples was <30X but was <19X for the combined Finland and Estonia callset.

103 ‡ Chromosome X F inbreeding coefficient 0.5-0.8 was used to denote indeterminate genotypic sex.

104 § Duplicates / monozygote twins were identified by identity-by-descent (PI HAT) > 0.95.

105 Filtering for phase 1 TOPMed samples (OOA, FHS, and JHS) may be slightly under-reported as sequencing centers may have filtered samples prior to transfer to the TOPMed Informatics Research Core.

106 EST = Estonia, FHS = Framingham Heart Study, FIN = Finland, JHS = Jackson Heart Study, MESA = Multi-Ethnic  
 107 Study of Atherosclerosis, OOA = Old Order Amish, TOPMed = Trans-Omics for Precision Medicine

109 **Supplementary Table 2. Baseline characteristics of study participants**

|                        | OOA          | FHS          | JHS         | MESA         | FIN          | EST          |
|------------------------|--------------|--------------|-------------|--------------|--------------|--------------|
| N                      | 1,083        | 4,064        | 3,247       | 4,510        | 1,165        | 2,255        |
| Coverage – X           | 38.3 (6.6)   | 37.7 (6.1)   | 37.6 (4.8)  | 35.7 (4.5)   | 30.1 (3.4)   | 29.7 (5.7)   |
| Age – y                | 50 (17)      | 40 (11)      | 56 (13)     | 61 (10)      | 49 (13)      | 47 (18)      |
| Women                  | 535 (49%)    | 2,198 (54%)  | 2,043 (63%) | 2,193 (49%)  | 596 (51%)    | 1,104 (49%)  |
| European ancestry      | 1,083 (100%) | 4,064 (100%) | 0 (0%)      | 1,846 (41%)  | 1,165 (100%) | 2,255 (100%) |
| Cholesterol – mg/dl    |              |              |             |              |              |              |
| Total                  | 212 (47)     | 198 (39)     | 199 (41)    | 195 (35)     | 216 (41)     | 215 (47)     |
| LDL                    | 140 (43)     | 121 (35)     | 126 (37)    | 118 (31)     | 133 (35)     | 107 (35)     |
| HDL                    | 56 (16)      | 54 (16)      | 52 (15)     | 51 (15)      | 55 (15)      | 59 (16)      |
| Triglycerides – mg/dl* | 63 [46-96]   | 89 [61-143]  | 90 [64-128] | 112 [78-162] | 111 [80-166] | 119 [86-166] |
| Blood pressure – mmHg  |              |              |             |              |              |              |
| Systolic               | 121 (16)     | 120 (16)     | 127 (18)    | 125 (21)     | 135 (19)     | 129 (19)     |
| Diastolic              | 74 (10)      | 77 (10)      | 79 (11)     | 72 (10)      | 81 (11)      | 80 (12)      |
| Diabetes mellitus      | 26 (2.4%)    | 67 (2%)      | 701 (22%)   | 382 (9%)     | 193 (16%)    | 89 (4%)      |
| Body-mass index        | 27 (5)       | 26 (5)       | 32 (7)      | 28 (5)       | 27 (5)       | 27 (5)       |
| Current smoker         | 106 (10%)    | 1,143 (29%)  | 399 (12%)   | 559 (12%)    | 382 (32%)    | 254 (5%)     |
| Current drug therapy   |              |              |             |              |              |              |
| Statins                | 35 (3%)      | 167 (4%)     | 405 (13%)   | 724 (16%)    | 56 (5%)      | 113 (5%)     |
| Antihypertensive       | 54 (5%)      | 248 (6%)     | 1,654 (51%) | 1,424 (32%)  | 161 (14%)    | 601 (27%)    |

110 Counts – N (%)

111 Continuous – Mean (Standard Deviation)

112 \* Triglycerides are summarized as median [IQR]

113 EST = Estonia, FHS = Framingham Heart Study, FIN = Finland, HDL = high-density lipoprotein, JHS = Jackson

114 Heart Study, LDL = low-density lipoprotein, MESA = Multi-Ethnic Study of Atherosclerosis, OOA = Old Order

115 Amish

116 **Supplementary Table 3. Distributions of variant metrics per sample.**

| Call Set             | Cohort | Transitions /<br>Transversions | Heterozygous /<br>Homozygous<br>genotypes | Total Variants<br>per Sample   | Singletons per<br>Sample  |
|----------------------|--------|--------------------------------|-------------------------------------------|--------------------------------|---------------------------|
| TOPMed<br>Phase 1    | OOA    | 2.153<br>[2.152-2.153]         | 1.46<br>[1.43-1.49]                       | 3,324,000<br>[3309000-3337000] | 90<br>[62-194]            |
|                      | FHS    | 2.152<br>[2.151-2.153]         | 1.56<br>[1.55-1.56]                       | 3,363,000<br>[3352000-3376000] | 2,518<br>[893-4,556]      |
|                      | JHS    | 2.148<br>[2.147-2.148]         | 2.07<br>[2.05-2.10]                       | 4,086,000<br>[4049000-4111000] | 8,205<br>[4,396-10,540]   |
| MESA                 | MESA   |                                |                                           |                                |                           |
|                      | EUR    | 2.127<br>[2.125-2.128]         | 1.64<br>[1.63-1.64]                       | 2,983,000<br>[2974000-2994000] | 10,880<br>[10,100-11,750] |
|                      | AFR    | 2.123<br>[2.121-2.124]         | 2.12<br>[2.10-2.14]                       | 3,519,000<br>[3461000-3557000] | 16,470<br>[15,510-17,450] |
|                      | ASN    | 2.119<br>[2.117-2.120]         | 1.38<br>[1.37-1.39]                       | 2,881,000<br>[2876000-2887000] | 20,360<br>[18,590-21,990] |
|                      | HISP   | 2.123<br>[2.121-2.124]         | 1.66<br>[1.60-1.69]                       | 3,011,000<br>[2986000-3090000] | 14,430<br>[11,240-15,570] |
| Finland &<br>Estonia | FIN    | 2.127<br>[2.126-2.128]         | 1.51<br>[1.49-1.52]                       | 3,596,000<br>[3588000-3606000] | 3,130<br>[2,298-4,276]    |
|                      | EST    | 2.127<br>[2.125-2.128]         | 1.51<br>[1.50-1.53]                       | 3,597,000<br>[3585000-3607000] | 4,389<br>[3,793-5,054]    |
| ALL                  |        | 2.146<br>[2.125-2.151]         | 1.58<br>[1.52-2.03]                       | 3,391,000<br>[3329000-3607000] | 4,878<br>[2,512-10,830]   |

117 AFR = African ancestry, ASN = Asian ancestry, EST = Estonia, EUR = European ancestry, FHS = Framingham  
118 Heart Study, FIN = Finland, JHS = Jackson Heart Study, HISP = Hispanic ancestry, MESA = Multi-Ethnic Study of  
119 Atherosclerosis, OOA = Old Order Amish

120 **Supplementary Table 4. Genomic inflation metrics for single variant association analyses.**

| $\lambda_{GC}$    | MAF 0.1-0.5% | MAF 0.5-1% | MAF 1-5% | MAF 5-50% |
|-------------------|--------------|------------|----------|-----------|
| Total cholesterol | 1.054        | 1.073      | 1.076    | 1.031     |
| HDL-C             | 0.981        | 0.983      | 0.987    | 1.023     |
| LDL-C             | 1.055        | 1.076      | 1.083    | 1.023     |
| Triglycerides     | 0.959        | 0.943      | 0.946    | 1.013     |

121 HDL-C = high-density lipoprotein cholesterol, LDL-C = low-density lipoprotein cholesterol, MAF = minor allele  
 122 frequency,  $\lambda_{GC}$  = genomic control lambda metric



123 **Supplementary Table 5. Allele frequency distribution of variants associated ( $P < 5 \times 10^{-8}$ )**  
 124 **with plasma lipids.**

| N                 | MAF 0.1-0.5% | MAF 0.5-1% | MAF 1-5% | MAF 5-50% | ALL |
|-------------------|--------------|------------|----------|-----------|-----|
| Total cholesterol | 16           | 13         | 109      | 454       | 592 |
| HDL-C             | 2            | 1          | 17       | 427       | 447 |
| LDL-C             | 28           | 25         | 106      | 538       | 697 |
| Triglycerides     | 4            | 1          | 13       | 504       | 522 |

125 HDL-C = high-density lipoprotein cholesterol, LDL-C = low-density lipoprotein cholesterol, MAF = minor allele  
 126 frequency  
 127

**Supplementary Table 6. Lead individual genome sequence variants associated with blood lipids.**

| Locus                    | Genomic coordinates* | rsID        | Gene, consequence†                   | Alternate allele frequency, Callsets with MAF>0.1%‡ | Alternate allele effect estimate | Standard error | P                      | Known locus§ | Prior lead¶ | Lead previously tagged¶¶ |
|--------------------------|----------------------|-------------|--------------------------------------|-----------------------------------------------------|----------------------------------|----------------|------------------------|--------------|-------------|--------------------------|
| <b>Total cholesterol</b> |                      |             |                                      |                                                     |                                  |                |                        |              |             |                          |
| 19q13.32                 | 19:45412079:C:T      | rs7412      | <i>APOE</i><br>p.Arg176Cys           | 8.0 %<br>T, M, F                                    | -15.4 mg/dL                      | 0.8 mg/dL      | 8.1x10 <sup>-94</sup>  | Y            | Y           | Y                        |
| 19p13.2                  | 19:11190652:G:A      | rs142130958 | <i>(LDLR-DOCK6)</i>                  | 11.6 %<br>T, M, F                                   | -10.7 mg/dL                      | 0.7 mg/dL      | 6.2x10 <sup>-50</sup>  | Y            | N           | Y                        |
| 1p32.3                   | 1:55529215:C:A       | rs28362286  | <i>PCSK9</i><br>p.Cys679Ter          | 0.4 %<br>T, M                                       | -39.9 mg/dL                      | 4.1 mg/dL      | 4.5x10 <sup>-27</sup>  | Y            | N           | N                        |
| 1p13.3                   | 1:109817590:G:T      | rs12740374  | <i>(SORT1)</i>                       | 23.4 %<br>T, M, F                                   | -5.4 mg/dL                       | 0.5 mg/dL      | 9.6x10 <sup>-25</sup>  | Y            | Y           | Y                        |
| 2p24.1                   | 2:21267461:G:A       | rs934197    | <i>(APOB)</i>                        | 24.7 %<br>T, M, F                                   | +4.3 mg/dL                       | 0.5 mg/dL      | 2.6x10 <sup>-16</sup>  | Y            | N           | Y                        |
| 19p13.11                 | 19:19329924:C:T      | rs2228603   | <i>NCAN</i><br>p.Pro92Thr            | 5.5 %<br>T, M, F                                    | -6.0 mg/dL                       | 1.0 mg/dL      | 1.7x10 <sup>-10</sup>  | Y            | N           | Y                        |
| 16q22.2                  | 16:72188889:G:A      | rs60201663  | <i>(PMFBI)</i>                       | 4.4 %<br>T, M                                       | +7.5 mg/dL                       | 1.3 mg/dL      | 1.0x10 <sup>-9</sup>   | Y            | N           | N                        |
| 2p21                     | 2:44074431:C:T       | rs4245791   | <i>(ABCG8)</i>                       | 75.6 %<br>T, M, F                                   | -3.2 mg/dL                       | 0.5 mg/dL      | 2.6x10 <sup>-9</sup>   | Y            | N           | Y                        |
| 2p23.3                   | 2:27730940:T:C       | rs1260326   | <i>GCKR</i><br>p.Leu446Pro           | 66.5 %<br>T, M, F                                   | -2.9 mg/dL                       | 0.5 mg/dL      | 6.4x10 <sup>-9</sup>   | Y            | Y           | Y                        |
| 17q11.1                  | 17:25686461:G:A      | rs74858876  | <i>(WSBI)</i>                        | 0.9 %<br>T, M, F                                    | -13.5 mg/dL                      | 2.3 mg/dL      | 1.2x10 <sup>-8</sup>   | N            | N           | N                        |
| 17p12                    | 17:15328696:A:C      | NA          | <i>(TVP23C-CDRT4)</i>                | 0.7 %<br>F                                          | +42.7 mg/dL                      | 6.8 mg/dL      | 2.5x10 <sup>-8</sup>   | N            | N           | N                        |
| 5q33.2                   | 5:152714715:T:A      | rs186120725 | <i>(GRIA1)</i>                       | 1.1 %<br>T, M, F                                    | +13.1 mg/dL                      | 2.3 mg/dL      | 2.8x10 <sup>-8</sup>   | N            | N           | N                        |
| 15q21.3                  | 15:58723675:C:T      | rs1800588   | <i>(LIPC)</i>                        | 31.4 %<br>T, M, F                                   | +2.8 mg/dL                       | 0.5 mg/dL      | 3.9x10 <sup>-8</sup>   | Y            | Y           | Y                        |
| <b>LDL-C</b>             |                      |             |                                      |                                                     |                                  |                |                        |              |             |                          |
| 19q13.32                 | 19:45412079:C:T      | rs7412      | <i>APOE</i><br>p.Arg176Cys           | 8.0 %<br>T, M, F                                    | -19.6 mg/dL                      | 0.8 mg/dL      | 3.6x10 <sup>-186</sup> | Y            | Y           | Y                        |
| 19p13.2                  | 19:11190652:G:A      | rs142130958 | <i>(LDLR-DOCK6)</i>                  | 11.6 %<br>T, M, F                                   | -10.5 mg/dL                      | 0.7 mg/dL      | 1.3x10 <sup>-57</sup>  | Y            | N           | Y                        |
| 1p32.3                   | 1:55529215:C:A       | rs28362286  | <i>PCSK9</i><br>p.Cys679Ter          | 0.4 %<br>T, M                                       | -43.0 mg/dL                      | 3.8 mg/dL      | 3.7x10 <sup>-36</sup>  | Y            | N           | N                        |
| 1p13.3                   | 1:109817590:G:T      | rs12740374  | <i>(SORT1)</i>                       | 23.4 %<br>T, M, F                                   | -5.9 mg/dL                       | 0.5 mg/dL      | 1.6x10 <sup>-33</sup>  | Y            | Y           | Y                        |
| 2p24.1                   | 2:21267461:G:A       | rs934197    | <i>(APOB)</i>                        | 25.0 %<br>T, M, F                                   | +4.3 mg/dL                       | 0.5 mg/dL      | 1.4x10 <sup>-18</sup>  | Y            | Y           | Y                        |
| 2p21                     | 2:44074431:C:T       | rs4245791   | <i>(ABCG8)</i>                       | 75.6 %<br>T, M, F                                   | -3.1 mg/dL                       | 0.5 mg/dL      | 2.4x10 <sup>-10</sup>  | Y            | N           | Y                        |
| 10q25.2                  | 10:113028253:A:G     | rs779261368 | <i>(GPAM)</i>                        | 0.3 %<br>F                                          | +57.6 mg/dL                      | 8.5 mg/dL      | 4.9x10 <sup>-9</sup>   | Y            | N           | N                        |
| 7q31.33                  | 7:124373018:T:A      | rs185350393 | <i>(GPR37)</i>                       | 0.4 %<br>T, M                                       | -20.2 mg/dL                      | 3.8 mg/dL      | 1.8x10 <sup>-8</sup>   | N            | N           | N                        |
| 19q12                    | 19:31902141:G:A      | rs138573424 | <i>(TSHZ3)</i>                       | 0.6 %<br>T, M                                       | +17.0 mg/dL                      | 3.1 mg/dL      | 2.1x10 <sup>-8</sup>   | N            | N           | N                        |
| 17q11.1                  | 17:25686461:G:A      | rs74858876  | <i>(WSBI)</i>                        | 0.9 %<br>T, M, F                                    | -12.5 mg/dL                      | 2.2 mg/dL      | 2.9x10 <sup>-8</sup>   | N            | N           | N                        |
| <b>HDL-C</b>             |                      |             |                                      |                                                     |                                  |                |                        |              |             |                          |
| 16q13                    | 16:56990716:C:A      | rs247617    | <i>(CETP)</i>                        | 29.5 %<br>T, M, F                                   | +3.3 mg/dL                       | 0.2 mg/dL      | 6.2x10 <sup>-85</sup>  | Y            | Y           | Y                        |
| 8p21.3                   | 8:19819439:A:G       | rs326       | <i>(LPL)</i>                         | 37.8 %<br>T, M, F                                   | +1.7 mg/dL                       | 0.2 mg/dL      | 4.0x10 <sup>-24</sup>  | Y            | N           | N                        |
| 15q21.3                  | 15:58674308:G:A      | rs2043082   | <i>(LIPC)</i>                        | 31.8 %<br>T, M, F                                   | +1.5 mg/dL                       | 0.2 mg/dL      | 1.7x10 <sup>-19</sup>  | Y            | N           | Y                        |
| 11q23.3                  | 11:116623213:TA:T    | rs66505542  | <i>(APOA1-APOC3-APOA5)</i>           | 77.5 %<br>T, M, F                                   | +1.3 mg/dL                       | 0.2 mg/dL      | 1.2x10 <sup>-12</sup>  | Y            | N           | Y                        |
| 19p13.2                  | 19:8429323:G:A       | rs116843064 | <i>ANGPTL4</i><br>p.Glu40Lys         | 1.6 %<br>T, M, F                                    | +4.0 mg/dL                       | 0.6 mg/dL      | 6.1x10 <sup>-11</sup>  | Y            | Y           | Y                        |
| 19p13.2                  | 19:11350488:C:T      | rs2278426   | <i>ANGPTL8</i><br>p.Arg59Trp         | 10.0 %                                              | -1.7 mg/dL                       | 0.3 mg/dL      | 1.4x10 <sup>-10</sup>  | Y            | N           | N                        |
| 18q21.1                  | 18:47167214:T:C      | rs4939883   | <i>(LDLR-DOCK6)</i><br><i>(LIPG)</i> | 74.8 %<br>T, M, F                                   | +1.1 mg/dL                       | 0.2 mg/dL      | 1.9x10 <sup>-10</sup>  | Y            | Y           | Y                        |

|                          |                   |             |                                     |                   |                |           |                       |   |   |   |
|--------------------------|-------------------|-------------|-------------------------------------|-------------------|----------------|-----------|-----------------------|---|---|---|
| 9q31.1                   | 9:107664301:C:T   | rs1883025   | ( <i>ABCA1</i> )                    | 26.7 %<br>T, M, F | -1.1<br>mg/dL  | 0.2 mg/dL | 2.2x10 <sup>-9</sup>  | Y | Y | Y |
| 12q24.31                 | 12:125338529:C:T  | rs10773112  | ( <i>SCARB1</i> )                   | 63.1 %<br>T, M, F | +0.9<br>mg/dL  | 0.2 mg/dL | 6.2x10 <sup>-9</sup>  | Y | N | N |
| 1q42.3                   | 1:229336103:A:C   | NA          | ( <i>GALNT2</i> )                   | 0.2%<br>F         | +28.8<br>mg/dL | 4.3 mg/dL | 8.9x10 <sup>-9</sup>  | Y | N | N |
| 9p24.1                   | 9:5436973:TA:T    | rs3215707   | ( <i>PLGRKT</i> )                   | 2.0 %<br>T, M, F  | +3.3<br>mg/dL  | 0.6 mg/dL | 1.3x10 <sup>-8</sup>  | Y | N | N |
| 19q13.32                 | 19:45392254:C:T   | rs6857      | ( <i>APOE</i> )                     | 13.2 %<br>T, M, F | -1.3<br>mg/dL  | 0.2 mg/dL | 1.6x10 <sup>-8</sup>  | Y | N | N |
| 19q13.41                 | 19:52296537:A:C   | rs17834799  | ( <i>HAS1</i> )                     | 18.4 %<br>T, M, F | +1.1<br>mg/dL  | 0.2 mg/dL | 2.6x10 <sup>-8</sup>  | Y | N | N |
| <b>ln(Triglycerides)</b> |                   |             |                                     |                   |                |           |                       |   |   |   |
| 11q23.3                  | 11:116623213:TA:T | rs66505542  | ( <i>APOA1-APOC3-APOA5</i> )        | 77.5 %<br>T, M, F | -0.093         | 0.007     | 4.7x10 <sup>-35</sup> | Y | N | Y |
| 8p21.3                   | 8:19819439:A:G    | rs326       | ( <i>LPL</i> )                      | 37.8 %<br>T, M, F | -0.074         | 0.007     | 3.3x10 <sup>-30</sup> | Y | N | N |
| 2p23.3                   | 2:27730940:T:C    | rs1260326   | <i>GCKR</i>                         | 66.5 %<br>T, M, F | -0.060         | 0.007     | 9.9x10 <sup>-21</sup> | Y | Y | Y |
| 19p13.2                  | 19:8429323:G:A    | rs116843064 | p.Leu446Pro<br><i>ANGPTL4</i>       | 1.6 %<br>T, M, F  | -0.168         | 0.023     | 3.9x10 <sup>-14</sup> | Y | Y | Y |
| 19q13.32                 | 19:45422587:A:G   | rs12721054  | p.Glu40Lys<br>( <i>APOE-APOC1</i> ) | 4.0 %<br>T, M     | -0.132         | 0.018     | 9.0x10 <sup>-14</sup> | Y | Y | Y |
| 8q24.13                  | 8:126488930:A:G   | rs2980871   | ( <i>TRIB1</i> )                    | 33.6 %<br>T, M, F | -0.046         | 0.007     | 2.3x10 <sup>-11</sup> | Y | N | Y |
| 7q11.23                  | 7:73016862:T:C    | rs13240994  | ( <i>MLXIPL</i> )                   | 15.5 %<br>T, M, F | -0.053         | 0.009     | 2.8x10 <sup>-10</sup> | Y | N | Y |
| 17q21.31                 | 17:41926126:C:T   | rs72836561  | <i>CD300LG</i>                      | 1.7 %<br>T, M, F  | +0.132         | 0.022     | 2.5x10 <sup>-9</sup>  | Y | N | Y |
| 19p13.11                 | 19:19578743:A:G   | rs73002956  | p.Arg82Cys<br>( <i>CILP2</i> )      | 84.4 %<br>M, F    | -0.065         | 0.011     | 1.2x10 <sup>-8</sup>  | Y | Y | Y |

- 130 \* hg19 reference genome. Chromosome:Position:Reference Allele:Alternate Allele format  
131 † Nearest mapped gene listed in parenthesis when lead variant occurs outside of exonic regions. Consequence is  
132 listed for variants occurring within exonic regions.  
133 ‡ Alternate allele frequency is calculated from callsets where minor allele frequency exceeded 0.1%. Callsets that  
134 achieved this are indicated as T (TOPMed Phase 1), M (MESA), or F (Finland and Estonia).  
135 § Locus is previously significantly ( $P < 5 \times 10^{-8}$ ) associated with, ¶ is prior lead variant in significantly associated  
136 locus from, or ¶¶ in linkage disequilibrium ( $r^2 > 0.8$ ) with prior lead variant at locus in prior lipids genome-wide  
137 association studies.<sup>8-11</sup>  
138 Using a conventional alpha threshold of  $P < 5 \times 10^{-8}$ , 13, 10, 13, and 9 loci associated with total cholesterol, LDL-C,  
139 HDL-C, and triglycerides, respectively, including 5 at putative novel lipid loci. Using a more stringent alpha of  
140  $P < 5 \times 10^{-9}$ ,<sup>12</sup> 8, 7, 8, and 8 loci associated with total cholesterol, LDL-C, HDL-C, and triglycerides, respectively,  
141 which were all at known lipid loci. However, of these lead variants attaining  $P < 5 \times 10^{-9}$ , 2, 2, 2, and 1 variants were  
142 not previously tagged by prior lead variants.  
143 MAF = minor allele frequency; TOPMed = Trans-Omics for Precision Medicine

144 **Supplementary Table 7. Association of rs3215707 with HDL cholesterol by call set and**  
 145 **meta-analyzed results.**

| Callset           | MAF   | Effect estimate<br>(mg/dL) | Standard error<br>(mg/dL) | <i>P</i>               |
|-------------------|-------|----------------------------|---------------------------|------------------------|
| TOPMed Phase I    | 1.7 % | +2.7                       | 0.9                       | 2.0 x 10 <sup>-3</sup> |
| MESA              | 1.7%  | +2.8                       | 1.1                       | 6.4 x 10 <sup>-3</sup> |
| Finland & Estonia | 3.2%  | +4.7                       | 1.1                       | 4.4 x 10 <sup>-5</sup> |
| All*              | 2.2 % | +3.3                       | 0.6                       | 1.3 x 10 <sup>-8</sup> |

146 \* Meta-analyzed results

147

148 **Supplementary Table 8. Conditional single variant analyses among 8,394 TOPMed**  
 149 **participants.**

| Locus                | Mapped gene         | Known locus | Independent associations with $P < 5 \times 10^{-8}$ | Independent associations with $P < 1 \times 10^{-4}$ |
|----------------------|---------------------|-------------|------------------------------------------------------|------------------------------------------------------|
| <b>LDL-C</b>         |                     |             |                                                      |                                                      |
| 1p32.3               | <i>PCSK9</i>        | Y           | 3<br>rs28362286<br>rs74073082<br>rs11591147          | 7                                                    |
| 1p13.3               | <i>SORT1-CELSR2</i> | Y           | 1<br>rs12740374                                      | 2                                                    |
| 1q24.2               | NA                  | N           | 1<br>rs116593889                                     | 1                                                    |
| 2p24.1               | <i>APOB</i>         | Y           | 2<br>rs5742904<br>rs1041968                          | 5                                                    |
| 8q24.12              | NA                  | N           | 1<br>rs77049078                                      | 1                                                    |
| 19p13.2              | <i>LDLR-DOCK6</i>   | Y           | 1<br>rs138294113                                     | 7                                                    |
| 19q12                | NA                  | N           | 1<br>rs151327765                                     | 2                                                    |
| 19q13.32             | <i>APOE-APOC1</i>   | Y           | 3<br>rs7412<br>rs429358<br>rs114083252               | 6                                                    |
| <b>HDL-C</b>         |                     |             |                                                      |                                                      |
| 8p21.3               | <i>LPL</i>          | Y           | 1<br>rs326                                           | 3                                                    |
| 15q21.3              | <i>LIPC</i>         | Y           | 2<br>rs2070895<br>rs2043082                          | 2                                                    |
| 16q13                | <i>CETP</i>         | Y           | 3<br>rs247616<br>rs2033254<br>rs5883                 | 7                                                    |
| <b>Triglycerides</b> |                     |             |                                                      |                                                      |
| 1q43                 | <i>RYR2</i>         | N           | 1<br>rs541184829                                     | 4                                                    |
| 2p23.3               | <i>GCKR</i>         | Y           | 1<br>rs1260326                                       | 1                                                    |
| 8p21.3               | <i>LPL</i>          | Y           | 1<br>rs326                                           | 3                                                    |
| 11q23.3              | <i>APOC3</i>        | Y           | 1<br>rs66505542                                      | 5                                                    |
| 19q13.32             | <i>APOE-APOC1</i>   | Y           | 1<br>rs12721054                                      | 3                                                    |

150 All associations were adjusted for age, age<sup>2</sup>, sex, and empiric kinship matrix. LDL-C associations were further  
 151 adjusted for *APOB* p.Arg3527Gln and HDL-C and triglyceride associations were further adjusted for *APOC3*  
 152 p.Arg19Ter. The rsIDs of independent variants attaining  $P < 5 \times 10^{-8}$  are displayed.

153 **Supplementary Table 9. Mixed model SKAT association of disruptive protein-coding**  
 154 **mutations and blood lipids.**

| Gene                 | cMAF   | P                     |
|----------------------|--------|-----------------------|
| <b>LDL-C</b>         |        |                       |
| <i>LDLR</i>          | 0.021  | 3.4x10 <sup>-9</sup>  |
| <i>APOB</i>          | 0.026  | 2.1x10 <sup>-7</sup>  |
| <i>PCSK9</i>         | 0.025  | 3.2x10 <sup>-42</sup> |
| <i>LDLRAP1</i>       | 0.0015 | 0.38                  |
| <i>ABCG5</i>         | 0.012  | 0.12                  |
| <i>ABCG8</i>         | 0.033  | 0.071                 |
| <i>APOE</i>          | 0.019  | 7.2x10 <sup>-10</sup> |
| <b>HDL-C</b>         |        |                       |
| <i>APOA1</i>         | 0      | NA                    |
| <i>ABCA1</i>         | 0.023  | 1.3x10 <sup>-3</sup>  |
| <i>LCAT</i>          | 0.0026 | 1.6x10 <sup>-7</sup>  |
| <i>CETP</i>          | 0.0013 | 7.6x10 <sup>-5</sup>  |
| <i>LIPC</i>          | 0.014  | 0.16                  |
| <i>LIPG</i>          | 0.0024 | 0.29                  |
| <i>SCARB1</i>        | 0.0056 | 3.6x10 <sup>-4</sup>  |
| <b>Triglycerides</b> |        |                       |
| <i>LPL</i>           | 0.0042 | 7.9x10 <sup>-5</sup>  |
| <i>APOC2</i>         | 0      | NA                    |
| <i>APOA5</i>         | 0      | NA                    |
| <i>APOC3</i>         | 0.0089 | 1.1x10 <sup>-14</sup> |
| <i>GPIHBP1</i>       | 0      | NA                    |
| <i>LMF1</i>          | 0.0033 | 0.29                  |
| <i>ANGPTL3</i>       | 0.0024 | 0.032                 |
| <i>ANGPTL4</i>       | 0.0029 | 0.026                 |

155 Genes without disruptive mutations have cMAF 0 and P = NA.

156 cMAF = combined minor allele frequency

157

158 **Supplementary Table 10. Characteristics of grouping strategies for rare variant association**  
 159 **testing.**

|                                    | Tissue type    | Groups  |                    | TOPMed phase 1                  | MESA                            | Finland & Estonia              |
|------------------------------------|----------------|---------|--------------------|---------------------------------|---------------------------------|--------------------------------|
| Coding (LOF + missense metaSVM)    | NA             | 11,786  | cMAF<br>n variants | 0.24 [0.08-0.73] %<br>6 [3-11]  | 0.29 [0.11-0.82] %<br>6 [3-13]  | 0.15 [0.058-0.41] %<br>2 [1-4] |
| Sliding window                     | NA             | 180,240 | cMAF<br>n variants | 2.5 [1.1-4.4] %<br>22 [12-38]   | 2.8 [1.3-4.9] %<br>24 [14-42]   | 0.8 [0.3-1.9] %<br>6 [3-11]    |
| Transcription start site proximity | HepG2          | 18,887  | cMAF<br>n variants | 7.3 [3.8-11.9] %<br>70 [38-119] | 8.1 [4.4-13.2] %<br>79 [43-134] | 3.0 [1.4-5.4] %<br>21 [11-36]  |
|                                    | Adipose nuclei | 19,137  | cMAF<br>n variants | 7.3 [3.8-12.0] %<br>70 [37-119] | 8.1 [4.3-13.2] %<br>78 [42-134] | 3.0 [1.4-5.5] %<br>21 [11-36]  |
| Gene expression                    | HepG2          | 12,941  | cMAF<br>n variants | 6.2 [2.4-14.0] %<br>55 [21-137] | 6.9 [2.6-15.3] %<br>62 [24-155] | 2.5 [0.8-6.2] %<br>17 [6-42]   |
|                                    | Adipose nuclei | 12,869  | cMAF<br>n variants | 4.8 [1.9-11.3] %<br>42 [17-107] | 5.4 [2.2-12.5] %<br>48 [19-120] | 2.0 [0.6-5.1] %<br>13 [5-32]   |
| Hi-C                               | NA             | 9,958   | cMAF               | 22.4 [16.3-29.5] %              | 25.0 [18.4-32.6] %              | 11.0 [7.3-15.2] %              |
|                                    |                |         | n variants         | 263 [182-367]                   | 298 [208-417]                   | 78 [54-110]                    |

160 Summary statistics provided for groups that were included in meta-analysis. If at least one callset had >1 variant  
 161 with MAF<1% meeting inclusion criteria within a group, the group was included in analysis.

162 **Supplementary Table 11. mmSKAT association of rare coding and non-coding gene-linked**  
 163 **variants and blood lipids.**

| Gene                 | <i>P</i> value        |                            |                                        |                              |                                          |                       |
|----------------------|-----------------------|----------------------------|----------------------------------------|------------------------------|------------------------------------------|-----------------------|
|                      | LoF +<br>MetaSVM-D    | TSS<br>Proximity,<br>HepG2 | TSS<br>Proximity,<br>Adipose<br>nuclei | Gene<br>expression,<br>HepG2 | Gene<br>expression,<br>Adipose<br>nuclei | HiC                   |
| <b>LDL-C</b>         |                       |                            |                                        |                              |                                          |                       |
| <i>LDLR</i>          | 3.4x10 <sup>-9</sup>  | 9.7x10 <sup>-11</sup>      | 3.6x10 <sup>-10</sup>                  | 9.2x10 <sup>-10</sup>        | 0.22                                     | 2.2x10 <sup>-9</sup>  |
| <i>APOB</i>          | 2.1x10 <sup>-7</sup>  | 7.1x10 <sup>-3</sup>       | 5.3x10 <sup>-4</sup>                   | 0.09                         | 4.6x10 <sup>-5</sup>                     | 7.9x10 <sup>-4</sup>  |
| <i>PCSK9</i>         | 3.2x10 <sup>-42</sup> | 6.7x10 <sup>-4</sup>       | 1.1x10 <sup>-3</sup>                   | 4.3x10 <sup>-4</sup>         | 7.7x10 <sup>-4</sup>                     | 9.1x10 <sup>-4</sup>  |
| <i>LDLRAP1</i>       | 0.38                  | NA                         | 0.53                                   | 0.21                         | 0.55                                     | 0.25                  |
| <i>ABCG5</i>         | 0.12                  | NA                         | NA                                     | 4.7x10 <sup>-2</sup>         | 0.13                                     | 0.20                  |
| <i>ABCG8</i>         | 0.071                 | NA                         | NA                                     | 2.7x10 <sup>-2</sup>         | 6.9x10 <sup>-2</sup>                     | 0.20                  |
| <i>APOE</i>          | 7.2x10 <sup>-10</sup> | 1.3x10 <sup>-3</sup>       | 5.3x10 <sup>-4</sup>                   | 8.1x10 <sup>-26</sup>        | 9.2x10 <sup>-7</sup>                     | 8.7x10 <sup>-13</sup> |
| <b>HDL-C</b>         |                       |                            |                                        |                              |                                          |                       |
| <i>APOA1</i>         | NA                    | NA                         | 0.80                                   | 0.35                         | 6.2x10 <sup>-2</sup>                     | 0.28                  |
| <i>ABCA1</i>         | 1.3x10 <sup>-3</sup>  | 3.0x10 <sup>-2</sup>       | 5.3x10 <sup>-3</sup>                   | 0.11                         | 7.1x10 <sup>-2</sup>                     | 7.2x10 <sup>-2</sup>  |
| <i>LCAT</i>          | 1.6x10 <sup>-7</sup>  | 0.17                       | 5.0x10 <sup>-2</sup>                   | 3.6x10 <sup>-2</sup>         | 0.14                                     | 0.18                  |
| <i>CETP</i>          | 7.6x10 <sup>-5</sup>  | 4.7x10 <sup>-3</sup>       | 6.0x10 <sup>-2</sup>                   | 2.9x10 <sup>-3</sup>         | 5.1x10 <sup>-5</sup>                     | NA                    |
| <i>LIPC</i>          | 0.16                  | 6.7x10 <sup>-3</sup>       | 2.8x10 <sup>-3</sup>                   | 1.4x10 <sup>-2</sup>         | 2.6x10 <sup>-2</sup>                     | 2.6x10 <sup>-2</sup>  |
| <i>LIPG</i>          | 0.29                  | 0.32                       | 0.28                                   | 0.22                         | 0.47                                     | 0.11                  |
| <i>SCARB1</i>        | 3.6x10 <sup>-4</sup>  | 1.2x10 <sup>-3</sup>       | 0.17                                   | 6.5x10 <sup>-2</sup>         | 0.30                                     | 0.20                  |
| <b>Triglycerides</b> |                       |                            |                                        |                              |                                          |                       |
| <i>LPL</i>           | 7.9x10 <sup>-5</sup>  | 4.2x10 <sup>-4</sup>       | 3.6x10 <sup>-3</sup>                   | NA                           | 1.8x10 <sup>-2</sup>                     | NA                    |
| <i>APOC2</i>         | NA                    | 0.31                       | 0.84                                   | 0.16                         | 8.9x10 <sup>-3</sup>                     | 1.6x10 <sup>-2</sup>  |
| <i>APOA5</i>         | NA                    | 0.62                       | 0.48                                   | 5.6x10 <sup>-3</sup>         | 1.6x10 <sup>-2</sup>                     | 0.20                  |
| <i>APOC3</i>         | 1.1x10 <sup>-14</sup> | 7.8x10 <sup>-2</sup>       | NA                                     | 0.12                         | 3.0x10 <sup>-2</sup>                     | 0.13                  |
| <i>GPIHBP1</i>       | NA                    | NA                         | 2.7x10 <sup>-2</sup>                   | NA                           | NA                                       | NA                    |
| <i>LMF1</i>          | 0.29                  | 4.1x10 <sup>-2</sup>       | 0.28                                   | NA                           | NA                                       | 0.19                  |
| <i>ANGPTL3</i>       | 0.032                 | NA                         | NA                                     | 0.47                         | NA                                       | 0.48                  |
| <i>ANGPTL4</i>       | 0.026                 | 2.8x10 <sup>-3</sup>       | 2.8x10 <sup>-3</sup>                   | 0.35                         | 0.41                                     | 0.33                  |

164



165 **Supplementary Table 12. Coding and non-coding rare variant association analyses for**  
 166 ***LDLR, APOB, PCSK9, and APOE.***

| Annotation       | Number of variants included | SKAT-O P    | Gene         | Analysis type           |
|------------------|-----------------------------|-------------|--------------|-------------------------|
| DHS              | 420                         | 2.20E-13    | <i>LDLR</i>  | Non-adjusted            |
| CADD > 95th perc | 85                          | 0.016507761 | <i>LDLR</i>  | Non-adjusted            |
| Damaging         | 70                          | 0.000105029 | <i>LDLR</i>  | Non-adjusted            |
| Synonymous       | 64                          | 0.501905747 | <i>LDLR</i>  | Non-adjusted            |
| Introns          | 2554                        | 8.84E-10    | <i>LDLR</i>  | Non-adjusted            |
| By gene-express  | 147                         | 1.16E-06    | <i>LDLR</i>  | Non-adjusted            |
| By distance      | 353                         | 1.30E-06    | <i>LDLR</i>  | Non-adjusted            |
| By Hi-C          | 323                         | 6.09E-06    | <i>LDLR</i>  | Non-adjusted            |
| DHS              | 244                         | 0.000821988 | <i>PCSK9</i> | Non-adjusted            |
| CADD > 95th perc | 116                         | 9.45E-07    | <i>PCSK9</i> | Non-adjusted            |
| Damaging         | 27                          | 1.29E-49    | <i>PCSK9</i> | Non-adjusted            |
| Synonymous       | 61                          | 0.012308808 | <i>PCSK9</i> | Non-adjusted            |
| Introns          | 1235                        | 1.23E-05    | <i>PCSK9</i> | Non-adjusted            |
| By gene-express  | 149                         | 0.001039663 | <i>PCSK9</i> | Non-adjusted            |
| By distance      | 96                          | 0.000336438 | <i>PCSK9</i> | Non-adjusted            |
| By Hi-C          | 195                         | 0.000837411 | <i>PCSK9</i> | Non-adjusted            |
| DHS              | 180                         | 0.248127596 | <i>APOB</i>  | Non-adjusted            |
| CADD > 95th perc | 84                          | 0.505270678 | <i>APOB</i>  | Non-adjusted            |
| Damaging         | 32                          | 7.98E-81    | <i>APOB</i>  | Non-adjusted            |
| Synonymous       | 264                         | 0.379767073 | <i>APOB</i>  | Non-adjusted            |
| Introns          | 1662                        | 0.007298343 | <i>APOB</i>  | Non-adjusted            |
| By gene-express  | 2046                        | 1.12E-16    | <i>APOB</i>  | Non-adjusted            |
| By distance      | 160                         | 0.171355299 | <i>APOB</i>  | Non-adjusted            |
| By Hi-C          | 443                         | 4.77E-39    | <i>APOB</i>  | Non-adjusted            |
| DHS              | 284                         | 0.000442443 | <i>APOE</i>  | Non-adjusted            |
| CADD > 95th perc | 174                         | 1.35E-06    | <i>APOE</i>  | Non-adjusted            |
| Damaging         | 20                          | 3.35E-12    | <i>APOE</i>  | Non-adjusted            |
| Synonymous       | 20                          | 0.230403594 | <i>APOE</i>  | Non-adjusted            |
| Introns          | 115                         | 3.63E-12    | <i>APOE</i>  | Non-adjusted            |
| By gene-express  | 1682                        | 4.14E-24    | <i>APOE</i>  | Non-adjusted            |
| By distance      | 140                         | 0.001408016 | <i>APOE</i>  | Non-adjusted            |
| By Hi-C          | 725                         | 2.39E-15    | <i>APOE</i>  | Non-adjusted            |
| DHS              | 420                         | 1.58E-13    | <i>LDLR</i>  | Adjusted by damaging    |
| CADD > 95th perc | 85                          | 0.01808748  | <i>LDLR</i>  | Adjusted by damaging    |
| By gene-express  | 147                         | 1.17E-07    | <i>LDLR</i>  | Adjusted by damaging    |
| By Hi-C          | 323                         | 8.67E-06    | <i>LDLR</i>  | Adjusted by damaging    |
| DHS              | 244                         | 0.00018199  | <i>PCSK9</i> | Adjusted by damaging    |
| CADD > 95th perc | 116                         | 2.82E-06    | <i>PCSK9</i> | Adjusted by damaging    |
| By gene-express  | 149                         | 0.000432226 | <i>PCSK9</i> | Adjusted by damaging    |
| By Hi-C          | 195                         | 0.000913643 | <i>PCSK9</i> | Adjusted by damaging    |
| DHS              | 180                         | 0.391618489 | <i>APOB</i>  | Adjusted by damaging    |
| CADD > 95th perc | 84                          | 0.63418993  | <i>APOB</i>  | Adjusted by damaging    |
| By gene-express  | 2046                        | 0.014207386 | <i>APOB</i>  | Adjusted by damaging    |
| By Hi-C          | 443                         | 0.036077219 | <i>APOB</i>  | Adjusted by damaging    |
| DHS              | 284                         | 0.000364942 | <i>APOE</i>  | Adjusted by damaging    |
| CADD > 95th perc | 174                         | 1.48E-06    | <i>APOE</i>  | Adjusted by damaging    |
| By gene-express  | 1682                        | 1.38E-11    | <i>APOE</i>  | Adjusted by damaging    |
| By Hi-C          | 725                         | 6.13E-09    | <i>APOE</i>  | Adjusted by damaging    |
| DHS              | 420                         | 8.42E-05    | <i>LDLR</i>  | ENGAGE significant hits |
| CADD > 95th perc | 85                          | 0.01184684  | <i>LDLR</i>  | ENGAGE significant hits |
| Damaging         | 70                          | 1.60E-05    | <i>LDLR</i>  | ENGAGE significant hits |

|                  |      |             |              |                               |
|------------------|------|-------------|--------------|-------------------------------|
| By gene-express  | 147  | 0.060336229 | <i>LDLR</i>  | ENGAGE significant hits       |
| By Hi-C          | 323  | 0.002780276 | <i>LDLR</i>  | ENGAGE significant hits       |
| DHS              | 244  | 0.153720085 | <i>PCSK9</i> | ENGAGE significant hits       |
| CADD > 95th perc | 116  | 0.002863322 | <i>PCSK9</i> | ENGAGE significant hits       |
| Damaging         | 27   | 1.05E-40    | <i>PCSK9</i> | ENGAGE significant hits       |
| By gene-express  | 149  | 0.016102622 | <i>PCSK9</i> | ENGAGE significant hits       |
| By Hi-C          | 195  | 0.033758681 | <i>PCSK9</i> | ENGAGE significant hits       |
| DHS              | 180  | 0.797426031 | <i>APOB</i>  | ENGAGE significant hits       |
| CADD > 95th perc | 84   | 0.37793502  | <i>APOB</i>  | ENGAGE significant hits       |
| Damaging         | 32   | 7.66E-57    | <i>APOB</i>  | ENGAGE significant hits       |
| By gene-express  | 2046 | 6.46E-11    | <i>APOB</i>  | ENGAGE significant hits       |
| By Hi-C          | 443  | 7.98E-25    | <i>APOB</i>  | ENGAGE significant hits       |
| DHS              | 284  | 0.537612708 | <i>APOE</i>  | ENGAGE significant hits       |
| CADD > 95th perc | 174  | 0.761014142 | <i>APOE</i>  | ENGAGE significant hits       |
| Damaging         | 20   | 1.52E-05    | <i>APOE</i>  | ENGAGE significant hits       |
| By gene-express  | 1682 | 0.007776608 | <i>APOE</i>  | ENGAGE significant hits       |
| By Hi-C          | 725  | 0.068487884 | <i>APOE</i>  | ENGAGE significant hits       |
| DHS              | 420  | 0.029475065 | <i>LDLR</i>  | ENGAGE + WGS significant hits |
| CADD > 95th perc | 85   | 0.395846423 | <i>LDLR</i>  | ENGAGE + WGS significant hits |
| Damaging         | 70   | 1.68E-05    | <i>LDLR</i>  | ENGAGE + WGS significant hits |
| By gene-express  | 147  | 0.777551136 | <i>LDLR</i>  | ENGAGE + WGS significant hits |
| By Hi-C          | 323  | 0.192301922 | <i>LDLR</i>  | ENGAGE + WGS significant hits |
| DHS              | 244  | 0.06686142  | <i>PCSK9</i> | ENGAGE + WGS significant hits |
| CADD > 95th perc | 116  | 0.002151819 | <i>PCSK9</i> | ENGAGE + WGS significant hits |
| Damaging         | 27   | 1.29E-05    | <i>PCSK9</i> | ENGAGE + WGS significant hits |
| By gene-express  | 149  | 0.009146326 | <i>PCSK9</i> | ENGAGE + WGS significant hits |
| By Hi-C          | 195  | 0.042111119 | <i>PCSK9</i> | ENGAGE + WGS significant hits |
| DHS              | 180  | 1           | <i>APOB</i>  | ENGAGE + WGS significant hits |
| CADD > 95th perc | 84   | 0.846066671 | <i>APOB</i>  | ENGAGE + WGS significant hits |
| Damaging         | 32   | 0.448266106 | <i>APOB</i>  | ENGAGE + WGS significant hits |
| By gene-express  | 2046 | 0.85995284  | <i>APOB</i>  | ENGAGE + WGS significant hits |
| By Hi-C          | 443  | 0.795058406 | <i>APOB</i>  | ENGAGE + WGS significant hits |
| DHS              | 284  | 0.683875324 | <i>APOE</i>  | ENGAGE + WGS significant hits |
| CADD > 95th perc | 174  | 1           | <i>APOE</i>  | ENGAGE + WGS significant hits |
| Damaging         | 20   | 0.617432871 | <i>APOE</i>  | ENGAGE + WGS significant hits |
| By gene-express  | 1682 | 0.87541804  | <i>APOE</i>  | ENGAGE + WGS significant hits |
| By Hi-C          | 725  | 0.834482658 | <i>APOE</i>  | ENGAGE + WGS significant hits |

168 **Supplementary Table 13. Genes and monogenic mutations considered as contributors to**  
 169 **extreme lipid phenotypes.**

Monogenic risk genotypes:

1. AD = 0/1 or 1/1; AR = 1/1
2. MAF < 1% (AD) or <10% (AR)
3. ClinVar<sup>13</sup> LP/P for expected phenotype and not B  
 or “high confidence” loss-of-function by LOFTEE<sup>14</sup>)

| Phenotype  | Gene           | Inheritance | Exceptions                                                                                                 |
|------------|----------------|-------------|------------------------------------------------------------------------------------------------------------|
| High LDL-C | <i>LDLR</i>    | AD          | <i>only</i> ClinVar “familial_hypercholesterolemia”<br><i>only</i> ClinVar “familial_hypercholesterolemia” |
|            | <i>APOB</i>    | AD          |                                                                                                            |
|            | <i>PCSK9</i>   | AD          |                                                                                                            |
|            | <i>LDLRAP1</i> | AR          |                                                                                                            |
|            | <i>ABCG5</i>   | AR          |                                                                                                            |
|            | <i>ABCG8</i>   | AR          |                                                                                                            |
| Low LDL-C  | <i>APOB</i>    | AD          | <i>except</i> ClinVar “familial_hypercholesterolemia”                                                      |
|            | <i>PCSK9</i>   | AD          | <i>except</i> ClinVar “familial_hypercholesterolemia”                                                      |

170 AD = autosomal dominant; AR = autosomal recessive; HDL = high-density lipoprotein; LDL-C = low-density  
 171 lipoprotein cholesterol; LP = likely pathogenic; MAF = minor allele frequency; P = pathogenic

172 **Supplementary Table 14. Baseline characteristics of unrelated individuals within the**  
 173 **HUNT cohort with lipids.**

|                           |              |
|---------------------------|--------------|
| N                         | 25,534       |
| Female                    | 13,587 (53%) |
| Age (y)                   | 48 (16)      |
| Diabetes mellitus, type 2 | 1,943 (8%)   |
| Coronary artery disease   | 3,676 (14%)  |
| Hypertension              | 12,581 (49%) |
| Current smoker            | 6,696 (26%)  |
| Cholesterol (mg/dl)       |              |
| Total                     | 223 (48)     |
| LDL                       | 140 (42)     |
| HDL                       | 53 (15)      |
| Triglycerides (mg/dl)     | 66 (44)      |

174

175

176 **Supplementary Table 15. Model fit for lipid polygenic risk score modeling in HUNT.**

| <b>LDPred model</b>                      |                    |                  |                    |
|------------------------------------------|--------------------|------------------|--------------------|
| rho                                      |                    | N SNPs           | R2                 |
| Infinitesimal                            |                    | 2,013,592        | 0.212114156        |
| 1.00                                     |                    | 2,013,592        | 0.210936363        |
| 0.30                                     |                    | 2,013,592        | 0.219802889        |
| 0.10                                     |                    | 2,013,592        | 0.241752015        |
| 0.03                                     |                    | 2,013,592        | 0.276071541        |
| <b>0.01</b>                              |                    | <b>2,013,592</b> | <b>0.298016009</b> |
| 0.003                                    |                    | 2,013,592        | 0.196639074        |
| 0.001                                    |                    | 2,013,592        | 0.194917519        |
| 0.0003                                   |                    | 2,013,592        | 0.191353777        |
| 0.0001                                   |                    | 2,013,592        | 0.217751353        |
| Unweighted                               |                    | 2,013,592        | 0.206473811        |
| <b>LD pruning / p-value thresholding</b> |                    |                  |                    |
| r <sup>2</sup>                           | p-value            | N SNPs           | R2                 |
| 0.2                                      | 1.00               | 191,041          | 0.212253965        |
| 0.2                                      | 0.50               | 130,237          | 0.213372646        |
| 0.2                                      | 5x10 <sup>-2</sup> | 20,455           | 0.234203378        |
| 0.2                                      | 5x10 <sup>-4</sup> | 1,105            | 0.273260701        |
| 0.2                                      | 5x10 <sup>-6</sup> | 435              | 0.270072666        |
| 0.2                                      | 5x10 <sup>-8</sup> | 282              | 0.267177166        |
| 0.4                                      | 1.00               | 303,609          | 0.215066578        |
| 0.4                                      | 0.50               | 191,884          | 0.216963972        |
| 0.4                                      | 5x10 <sup>-2</sup> | 25,779           | 0.2440181          |
| 0.4                                      | 5x10 <sup>-4</sup> | 1,457            | 0.274625719        |
| 0.4                                      | 5x10 <sup>-6</sup> | 615              | 0.270472212        |
| 0.4                                      | 5x10 <sup>-8</sup> | 411              | 0.268238831        |
| 0.6                                      | 1.00               | 431,507          | 0.215830911        |
| 0.6                                      | 0.50               | 254,486          | 0.218009208        |
| 0.6                                      | 5x10 <sup>-2</sup> | 31,494           | 0.245994819        |
| 0.6                                      | 5x10 <sup>-4</sup> | 1,869            | 0.267250615        |
| 0.6                                      | 5x10 <sup>-6</sup> | 819              | 0.263103684        |
| 0.6                                      | 5x10 <sup>-8</sup> | 539              | 0.259650587        |
| 0.8                                      | 1.00               | 600,685          | 0.215212651        |
| 0.8                                      | 0.50               | 334,230          | 0.217733187        |
| 0.8                                      | 5x10 <sup>-2</sup> | 394,38           | 0.244644548        |
| 0.8                                      | 5x10 <sup>-4</sup> | 2,451            | 0.261998951        |
| 0.8                                      | 5x10 <sup>-6</sup> | 1,090            | 0.258413457        |
| 0.8                                      | 5x10 <sup>-8</sup> | 730              | 0.25478395         |
| Restricted                               |                    | 59               | 0.245520743        |

177 We trained several polygenic risk scores, based on two models (LDPred<sup>15</sup>, and LD pruning and  
 178 p-value thresholds). The key LDPred tuning parameter is rho, which is the assumption of the  
 179 proportion of causal SNPs in the set of training SNPs. We varied parameters specific to each  
 180 model for LDL cholesterol within the HUNT dataset. We selected the model with the best fit (by  
 181 R2) to bring forward to analysis; this was LDPred rho=0.01 and is highlighted in the table.

182 **Supplementary Fig. 1. Principal components and admixture across individuals analyzed.**

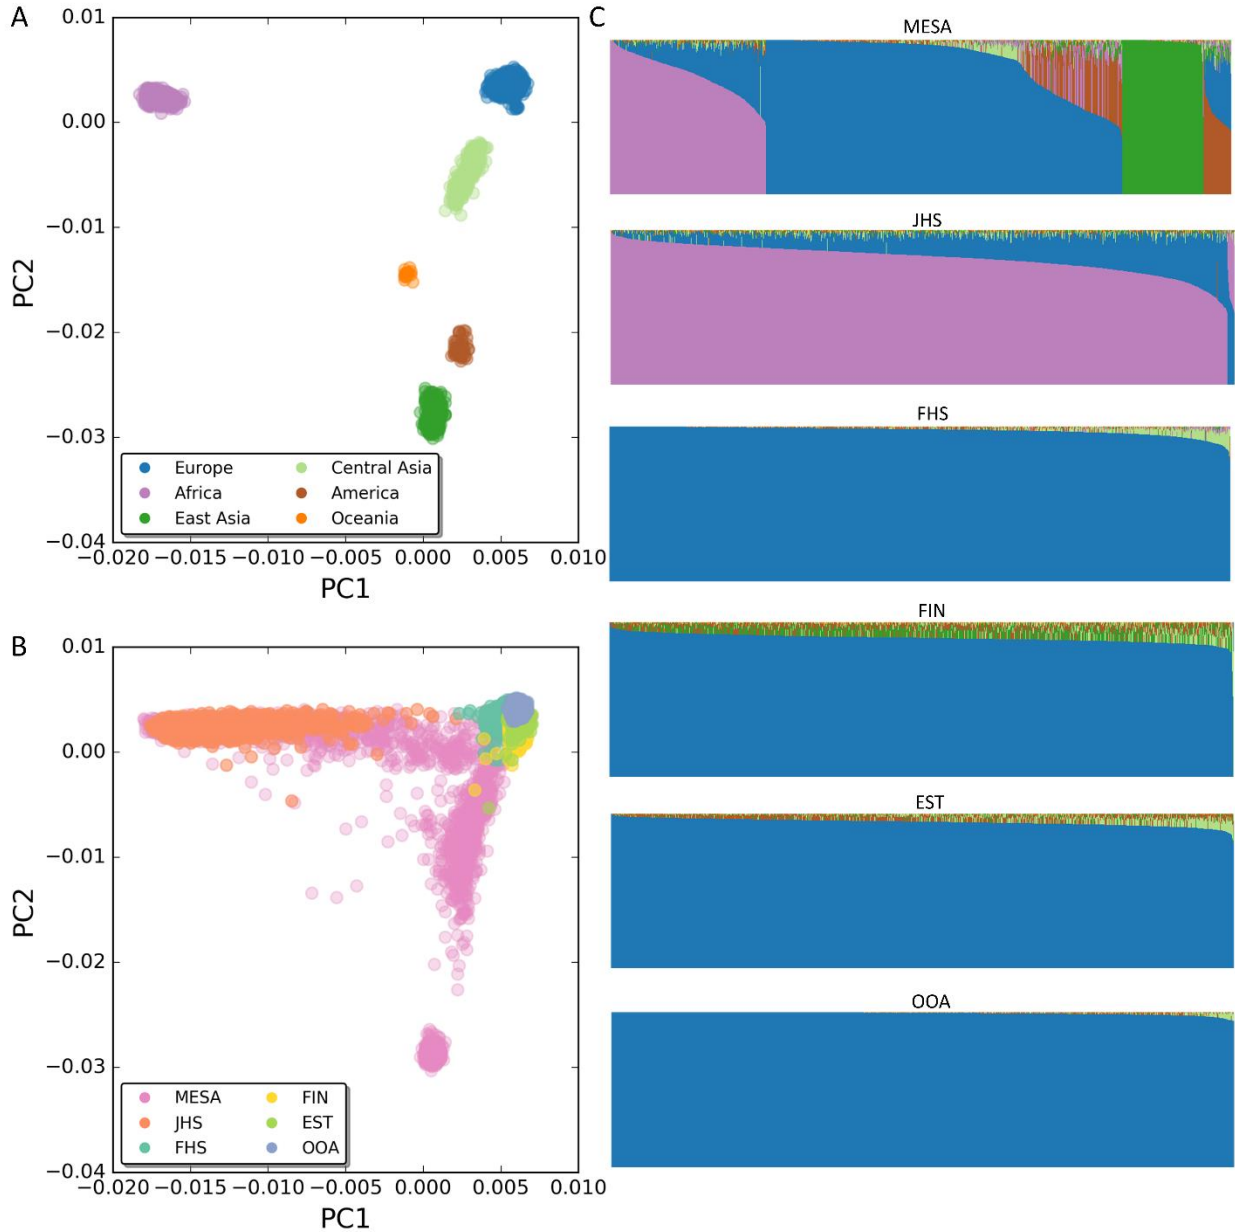

183  
 184 Approximately 16,000 ancestry-informative markers were used to estimate principle components of ancestry and  
 185 admixture. **a.** Principal components of reference samples are displayed. **b.** Principal components of study samples  
 186 are displayed. **c.** Ethnic admixture for all study samples by cohort are displayed.  
 187 EST = Estonia, FHS = Framingham Heart Study, FIN = Finland, JHS = Jackson Heart Study, MESA = Multi-Ethnic  
 188 Study of Atherosclerosis, OOA = Old Order Amish

189 **Supplementary Fig. 2. Distribution of whole genome sequencing coverage by cohort.**

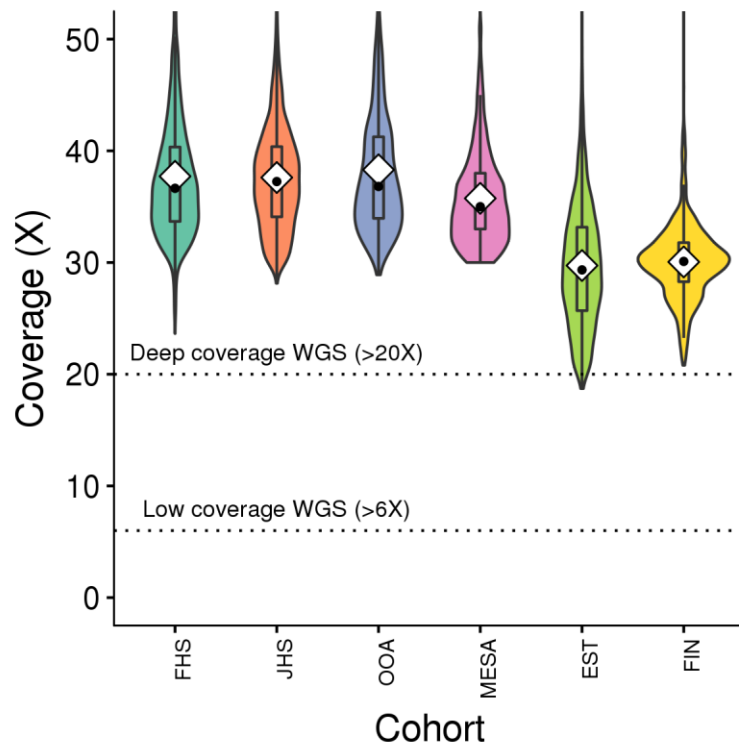

190  
191 16,324 individuals underwent whole genome sequencing with target coverage >30X among FHS, JHS, OOA, and  
192 MESA participants, and >20X among EST and FIN participants.  
193 EST = Estonia, FHS = Framingham Heart Study, FIN = Finland, JHS = Jackson Heart Study, MESA = Multi-Ethnic  
194 Study of Atherosclerosis, OOA = Old Order Amish

195 **Supplementary Fig. 3. Quantile-quantile and Manhattan plots of single variant associations**  
 196 **with blood lipids.**

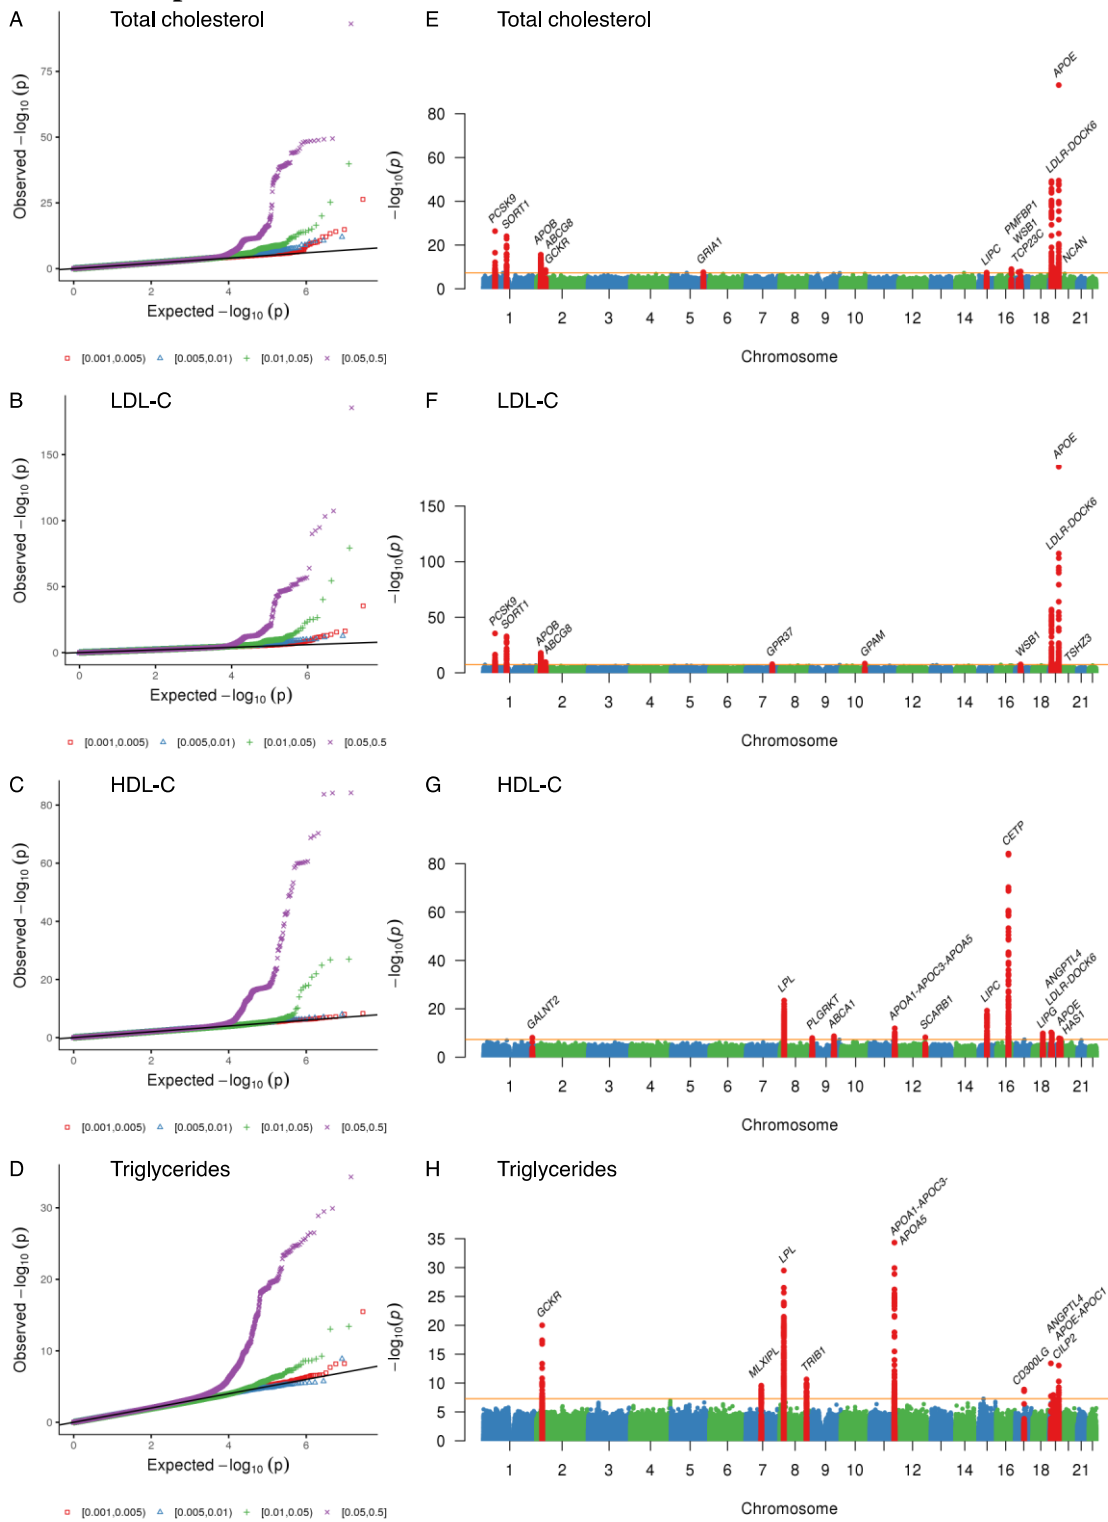

197  
 198  
 199 Individual variants were associated with total cholesterol, LDL-C, HDL-C, and triglycerides within three variant  
 200 callsets and meta-analyzed. Variants that achieved >0.1% for a given callset were included in the meta-analysis.



201 Given that *APOB* p.R3527Q explains a large proportion of variance of total cholesterol and LDL-C among OOA,  
202 presence of this mutation was adjusted for in the TOPMed Phase 1 according analyses. Given that *APOC3* p.R19Ter  
203 explains a large proportion of variance of HDL-C and triglycerides among OOA, presence of this mutation was  
204 adjusted for in the TOPMed Phase 1 according analyses. **a.-d.** Quantile-quantile plots and **e.-h.** Manhattan plots are  
205 displayed.  
206 HDL-C = high-density lipoprotein cholesterol, JHS = Jackson Heart Study, LDL-C = low-density lipoprotein  
207 cholesterol, OOA = Old Order Amish, TOPMed = Trans-Omics for Precision Medicine

208 **Supplementary Fig 4. Association of 9p24.1 locus 1-bp deletion with HDL cholesterol.**

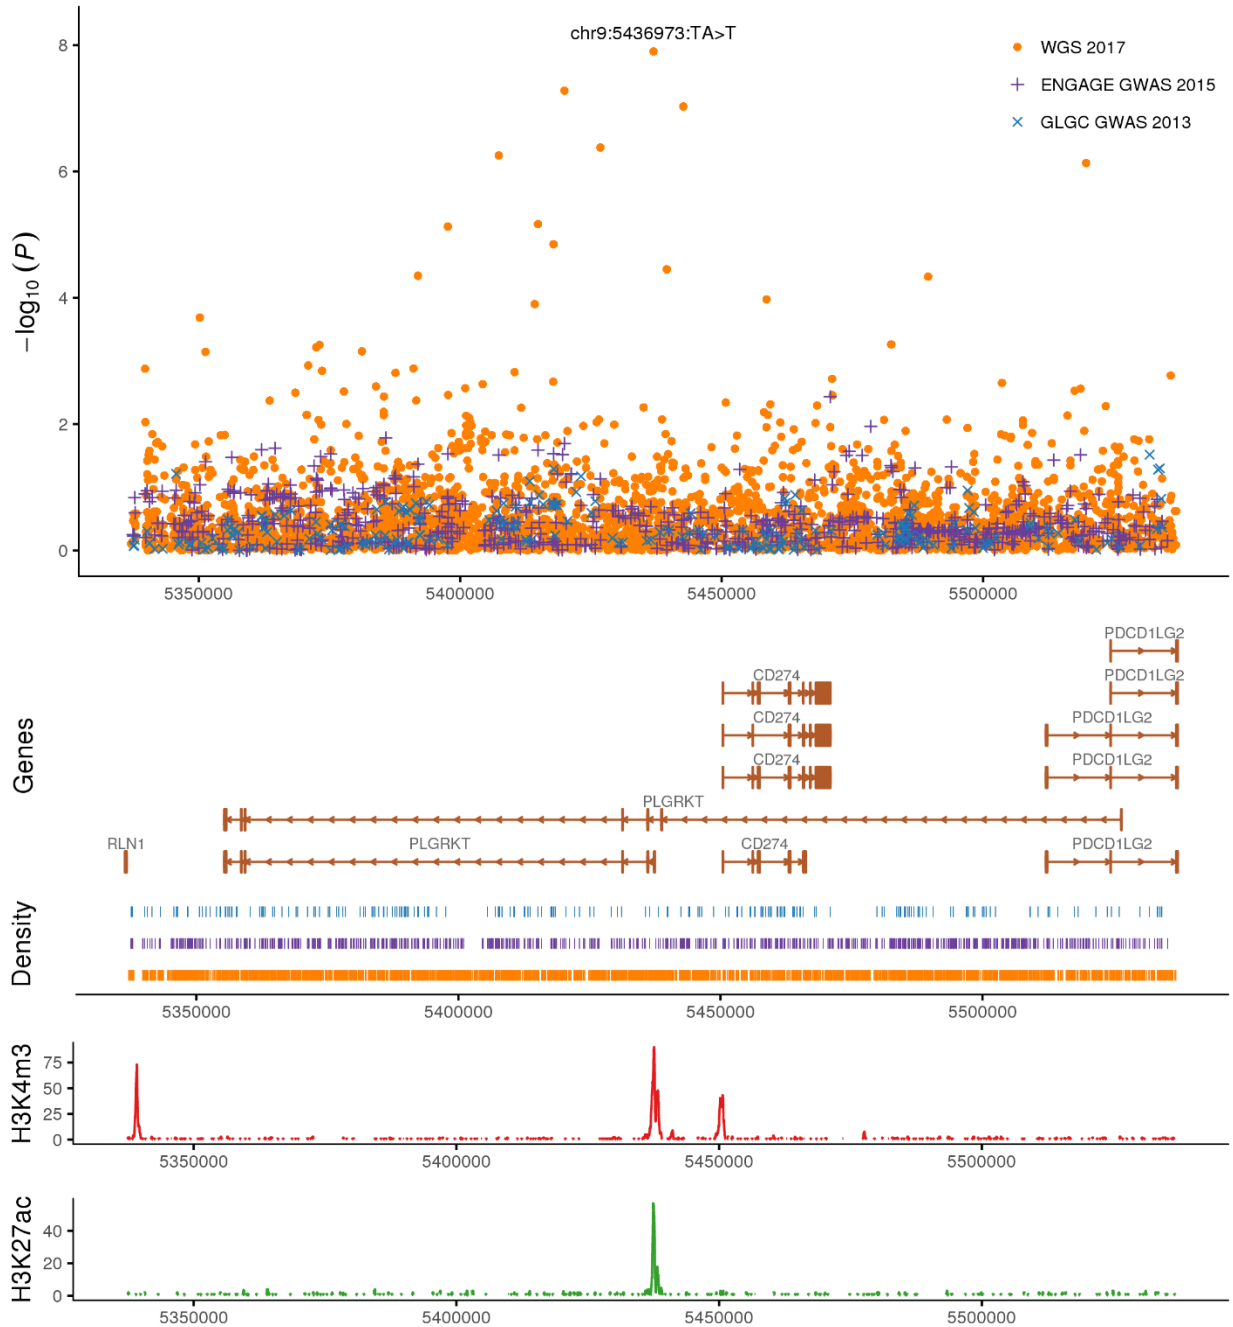

209  
 210 Regional association of meta-analysis  $-\log_{10}(P)$  results at the 9p24.1 locus for association with HDL-C are presented  
 211 with prior genome-wide association analyses with array-derived genotypes. The index 1-bp deletion is not in linkage  
 212 disequilibrium with variants previously catalogued by prior analyses. This variant lies within an intron of *PLGRKT*  
 213 and overlies H3K4m3 and H3K27ac chromatin modifications, indicating promoter and enhancer regions,  
 214 respectively.

215 **Supplementary Fig 5. African American-specific haplotype at the *LDLR* locus associated**  
216 **with LDL cholesterol.**

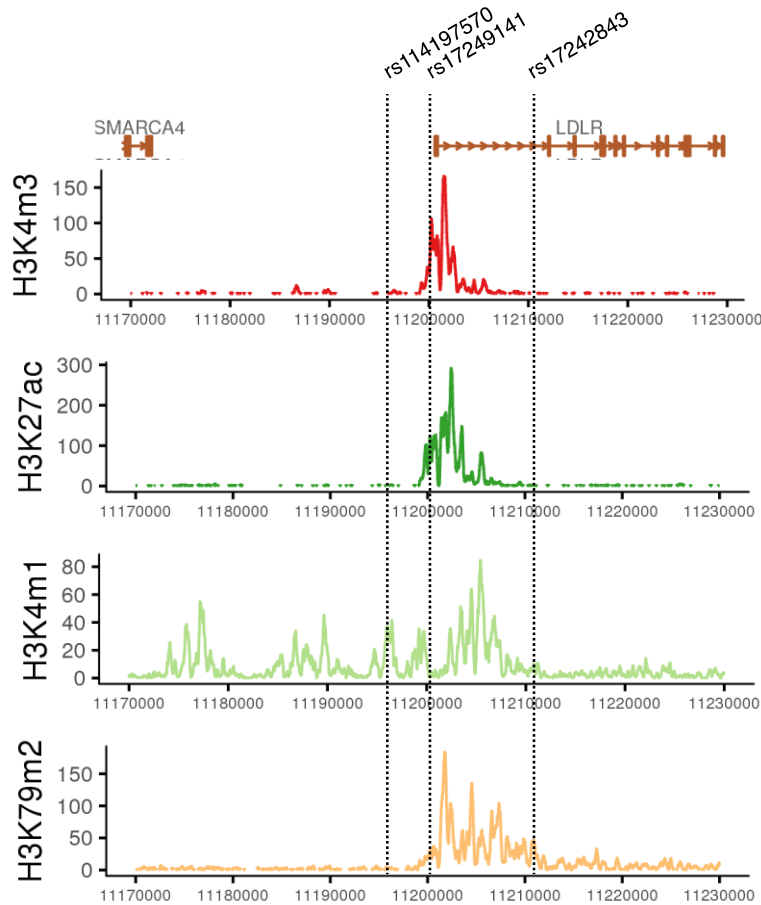

217

218 Independent variants common among African Americans in linkage disequilibrium ( $r^2 > 0.8$ ) at the *LDLR* locus  
219 associated with LD-C. Standardized histone modification scores for HepG2 cells are displayed, including H3K4m3  
220 (active promoter), H3K27ac (strong enhancer), H3K4m1 (weak enhancer), and H3K79m2 (transcription transition).

221 **Supplementary Fig. 6. Haplotype structure of 5' *LDLR* variants associated with LDL**  
 222 **cholesterol.**

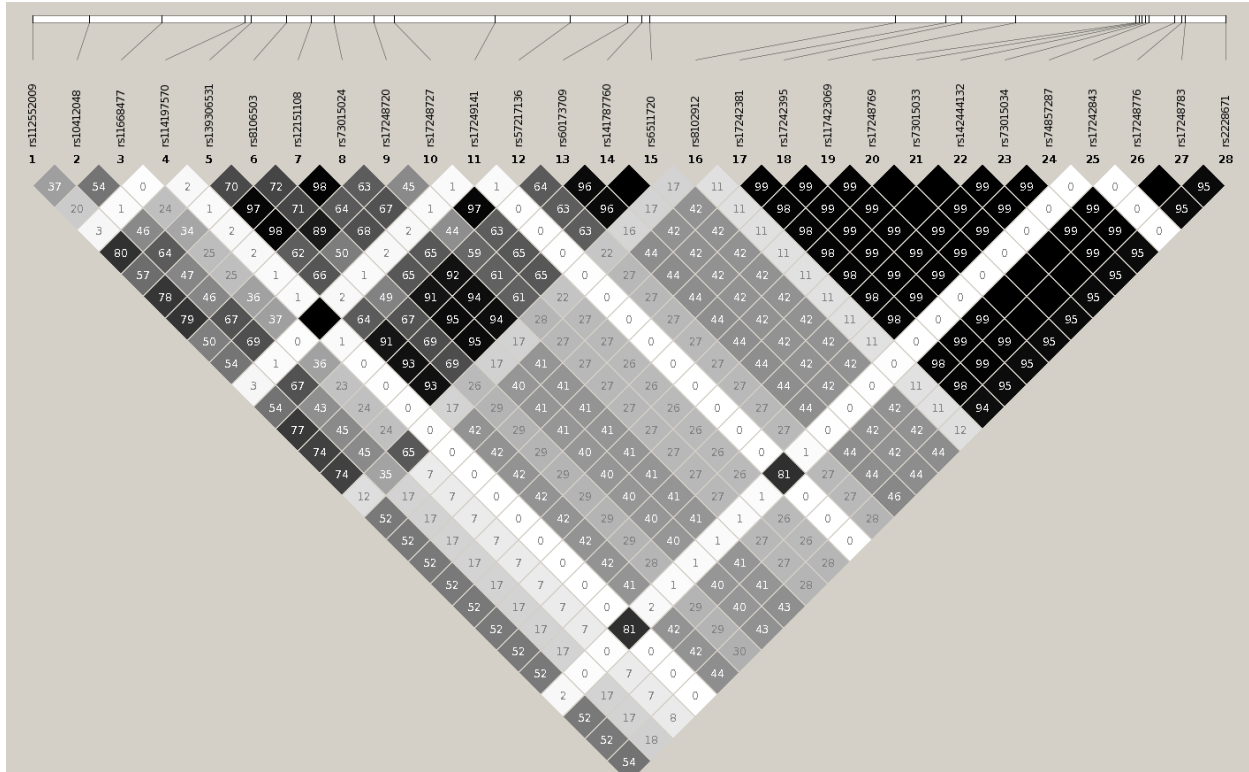

223 Haplotype of variants at chr19:11,193,080-11,211,000 (hg19), MAF > 0.1% within the TOPMed Phase I samples  
 224 associated with LDL-C ( $P < 1 \times 10^{-10}$ ).

225 MAF = minor allele frequency; LDL-C = low-density lipoprotein cholesterol; TOPMed = Trans-Omics for Precision  
 226 Medicine  
 227

228 **Supplementary Fig. 7. Regional association plot at the *LDLR* locus highlighting an African**  
229 **American-specific haplotype associated with LDL cholesterol.**

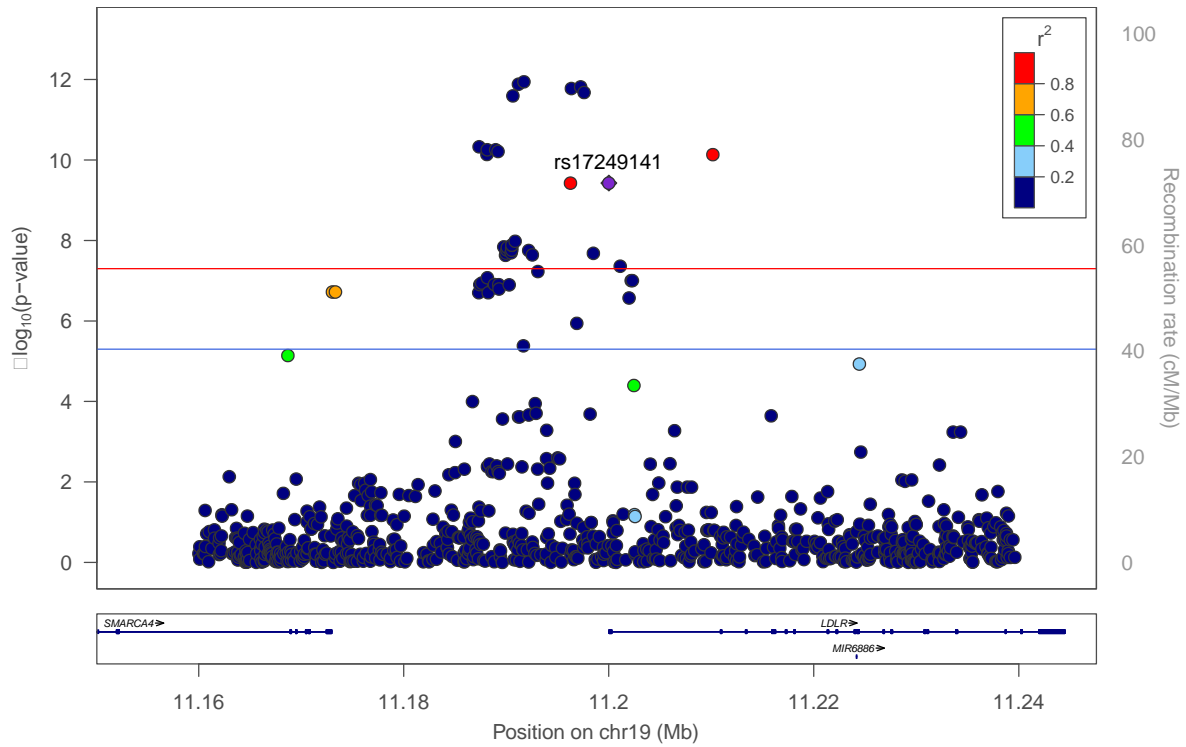

230  
231 Variants at the *LDLR* locus associated with LDL-C among the TOPMed Phase I samples. An African American-  
232 specific associated haplotype is highlighted (purple and red).

233 LDL-C = low-density lipoprotein cholesterol; TOPMed = Trans-Omics for Precision Medicine

234

235 **Supplementary Fig. 8. Combined minor allele frequency of disruptive mutations per gene.**

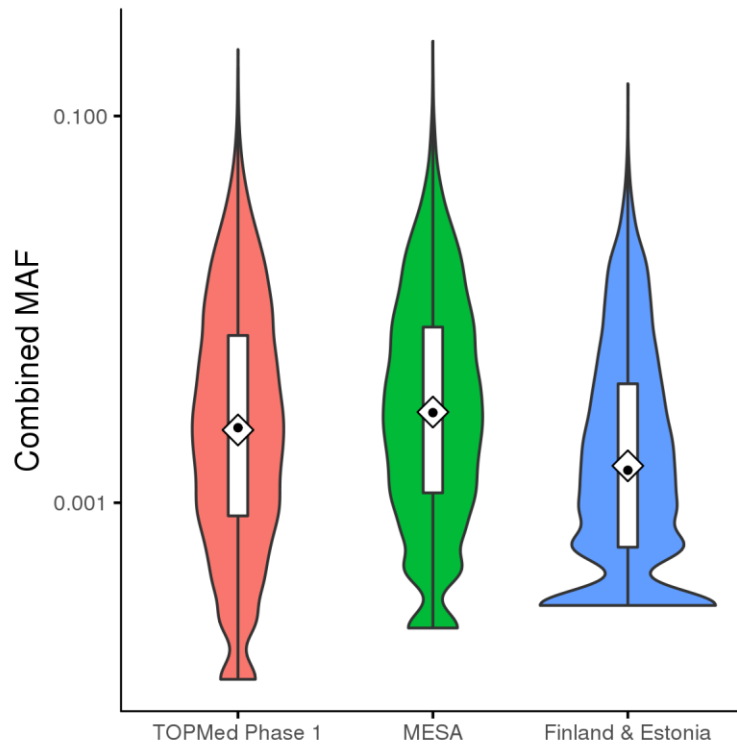

236  
237 Rare (MAF < 1%) variants annotated as loss-of-function or disruptive missense mutations by MetaSVM<sup>16</sup> were  
238 identified. The distribution of combined MAF of these variants per gene are displayed.  
239 MAF = minor allele frequency, MESA = Multi-Ethnic Study of Atherosclerosis, TOPMed = Trans-Omics for  
240 Precision Medicine

241 **Supplementary Fig. 9. Quantile-quantile plots of rare variant association tests.**

**Coding Burden: LOF + MetaSVM-D**

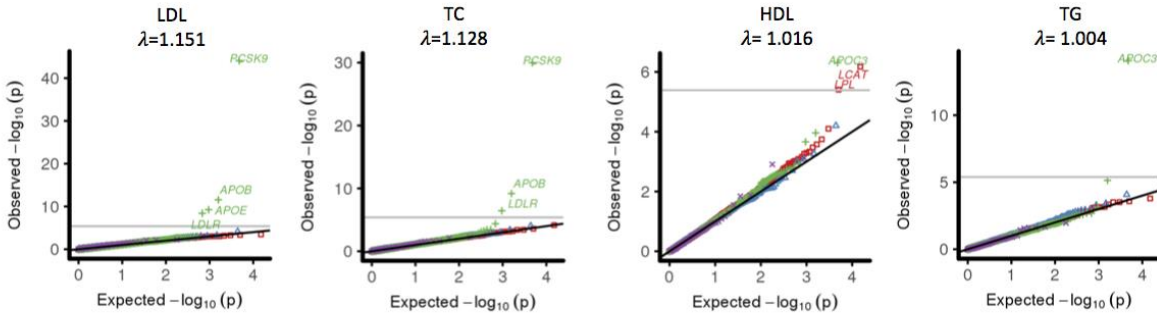

**NonCoding Burden: Sliding Window, HepG2**

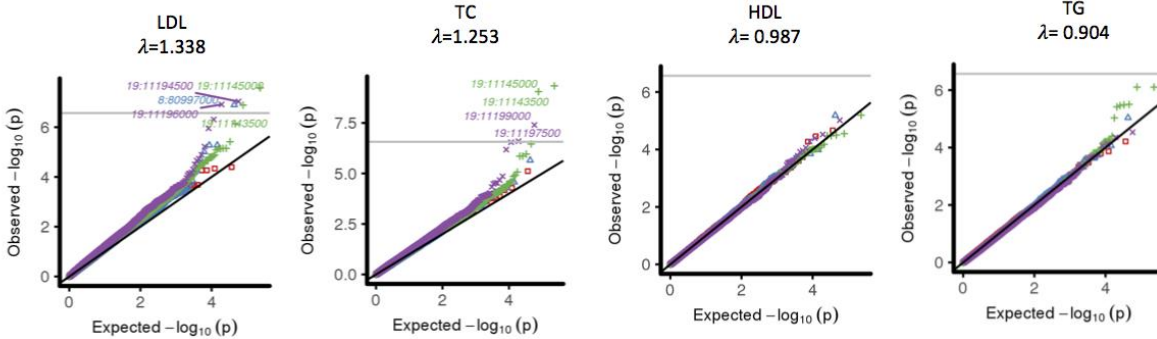

**NonCoding Burden: By Distance, HepG2**

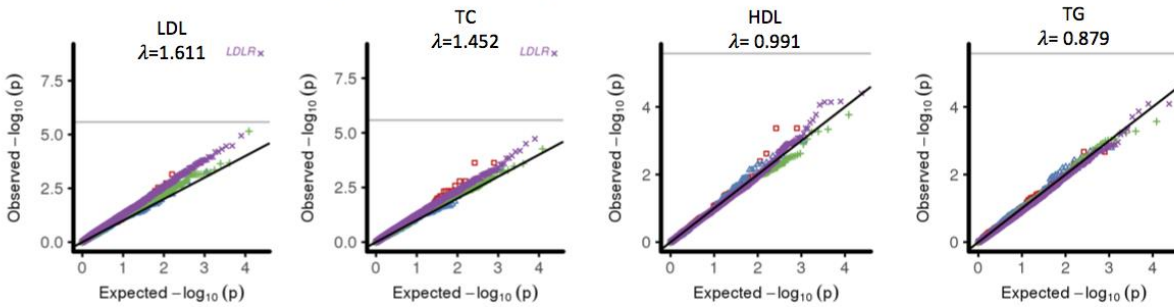

**NonCoding Burden: By Distance, Adipose**

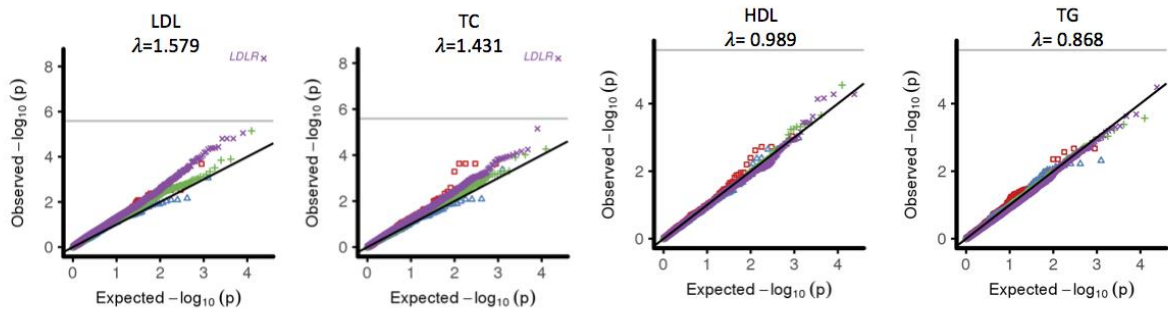

### NonCoding Burden: By Expression, HepG2

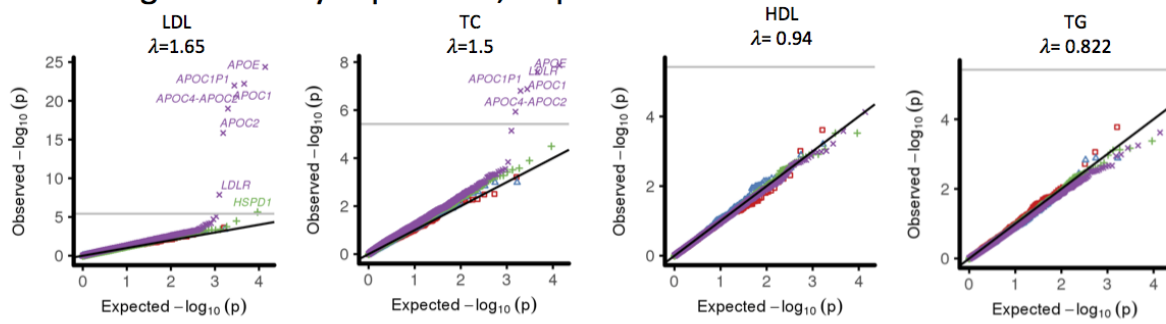

### NonCoding Burden: By Expression, Adipose

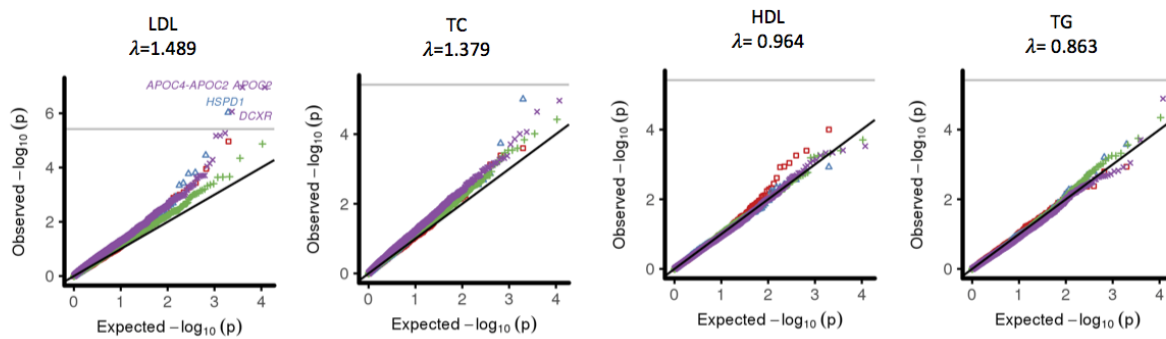

### NonCoding Burden: By HiC, HepG2

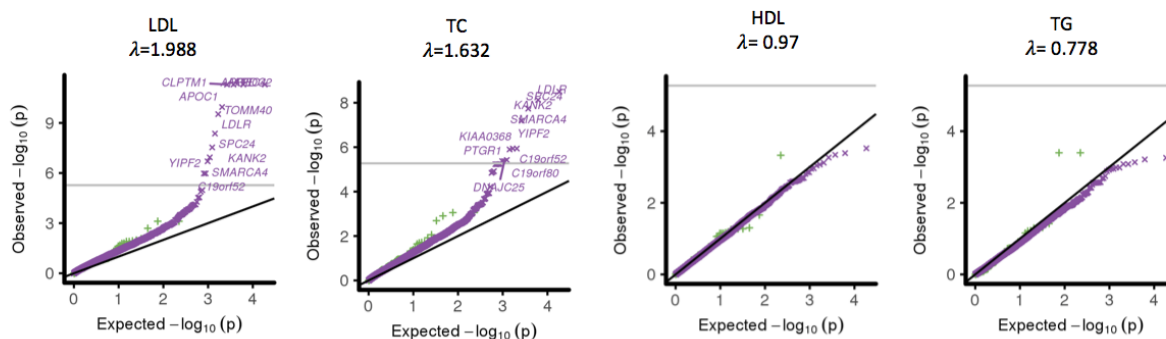

243

244 Genome-wide rare variant coding and non-coding association analyses are presented for total cholesterol, HDL-C,  
 245 LDL-C, and triglycerides. Dots are color coded by combined MAF bin (purple: MAF > 5%, green: MAF 1-5%, blue  
 246 MAF 0.5-1%, red MAF 0.1-0.5%). Horizontal line corresponds to  $-\log_{10}$  of Bonferroni-corrected alpha threshold:  
 247  $0.05/20,000$  gene-associated groups =  $2.5 \times 10^{-6}$ .  
 248 HDL-C = high-density lipoprotein cholesterol; LDL-C = low-density lipoprotein cholesterol; LOF = loss-of-  
 249 function; MAF = minor allele frequency; TC = total cholesterol; TG = triglycerides



250 **Supplementary Fig. 10. Coding and non-coding rare variant association analyses for**  
 251 ***LDLR*.**

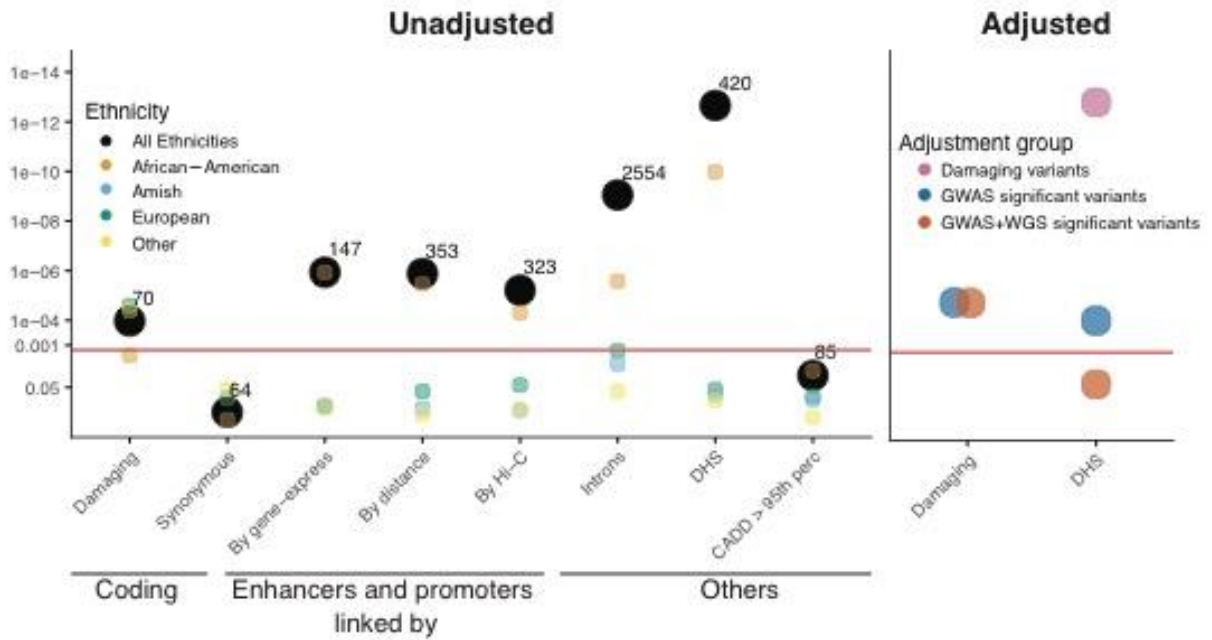

252 Results of coding and non-coding rare (MAF < 1%) variant testing are presented. Numbers represent the number of  
 253 variants included in grouping strategies. The line represents the Bonferroni level of significance ( $P = 0.05 / 13$  tests  
 254 = 0.004). Damaging coding variants remain associated despite conditioning on single variants reaching genome-  
 255 wide significance either previously or in our study ( $P < 5 \times 10^{-8}$ ). After observing the strongest non-coding association  
 256 with DNase hypersensitivity sites, we did additional conditional analyses. Non-coding association was independent  
 257 of coding associations but was no longer present after adjusting for individually-associated ( $P < 5 \times 10^{-8}$ ) variants.  
 258

259 **Supplementary References**

260

- 261 1. Kannel, W.B., Dawber, T.R., Kagan, A., Revotskie, N. & Stokes, J., 3rd. Factors of risk in  
262 the development of coronary heart disease--six year follow-up experience. The  
263 Framingham Study. *Ann Intern Med* **55**, 33-50 (1961).
- 264 2. Taylor, H.A., Jr. *et al.* Toward resolution of cardiovascular health disparities in African  
265 Americans: design and methods of the Jackson Heart Study. *Ethn Dis* **15**, S6-4-17 (2005).
- 266 3. Post, W. *et al.* Determinants of coronary artery and aortic calcification in the Old Order  
267 Amish. *Circulation* **115**, 717-24 (2007).
- 268 4. Mitchell, B.D. *et al.* The genetic response to short-term interventions affecting  
269 cardiovascular function: rationale and design of the Heredity and Phenotype  
270 Intervention (HAPI) Heart Study. *Am Heart J* **155**, 823-8 (2008).
- 271 5. Bild, D.E. *et al.* Multi-Ethnic Study of Atherosclerosis: objectives and design. *Am J*  
272 *Epidemiol* **156**, 871-81 (2002).
- 273 6. Vartiainen, E. *et al.* Cardiovascular risk factor changes in Finland, 1972-1997. *Int J*  
274 *Epidemiol* **29**, 49-56 (2000).
- 275 7. Nelis, M. *et al.* Genetic structure of Europeans: a view from the North-East. *PLoS One* **4**,  
276 e5472 (2009).
- 277 8. Kathiresan, S. *et al.* Common variants at 30 loci contribute to polygenic dyslipidemia.  
278 *Nat Genet* **41**, 56-65 (2009).
- 279 9. Surakka, I. *et al.* The impact of low-frequency and rare variants on lipid levels. *Nat Genet*  
280 **47**, 589-97 (2015).
- 281 10. Teslovich, T.M. *et al.* Biological, clinical and population relevance of 95 loci for blood  
282 lipids. *Nature* **466**, 707-13 (2010).
- 283 11. Willer, C.J. *et al.* Discovery and refinement of loci associated with lipid levels. *Nat Genet*  
284 (2013).
- 285 12. Pulit, S.L., de With, S.A. & de Bakker, P.I. Resetting the bar: Statistical significance in  
286 whole-genome sequencing-based association studies of global populations. *Genet*  
287 *Epidemiol* **41**, 145-151 (2017).
- 288 13. Landrum, M.J. *et al.* ClinVar: public archive of interpretations of clinically relevant  
289 variants. *Nucleic Acids Res* **44**, D862-8 (2016).
- 290 14. Karczewski, K.J. LOFTEE (Loss-Of-Function Transcript Effect Estimator). (2015).
- 291 15. Vilhjalmsen, B.J. *et al.* Modeling Linkage Disequilibrium Increases Accuracy of Polygenic  
292 Risk Scores. *Am J Hum Genet* **97**, 576-92 (2015).
- 293 16. Dong, C. *et al.* Comparison and integration of deleteriousness prediction methods for  
294 nonsynonymous SNVs in whole exome sequencing studies. *Hum Mol Genet* **24**, 2125-37  
295 (2015).

296
